# Supplementary material for: Evolution of Bacterial Phosphoglycerate Mutases: Non-Homologous Isofunctional Enzymes Undergoing Gene Losses, Gains and Lateral Transfers
Source: PubMed Central journal article supplement (PMC2964296; doi:10.1371/journal.pone.0013576), 2010-10-26

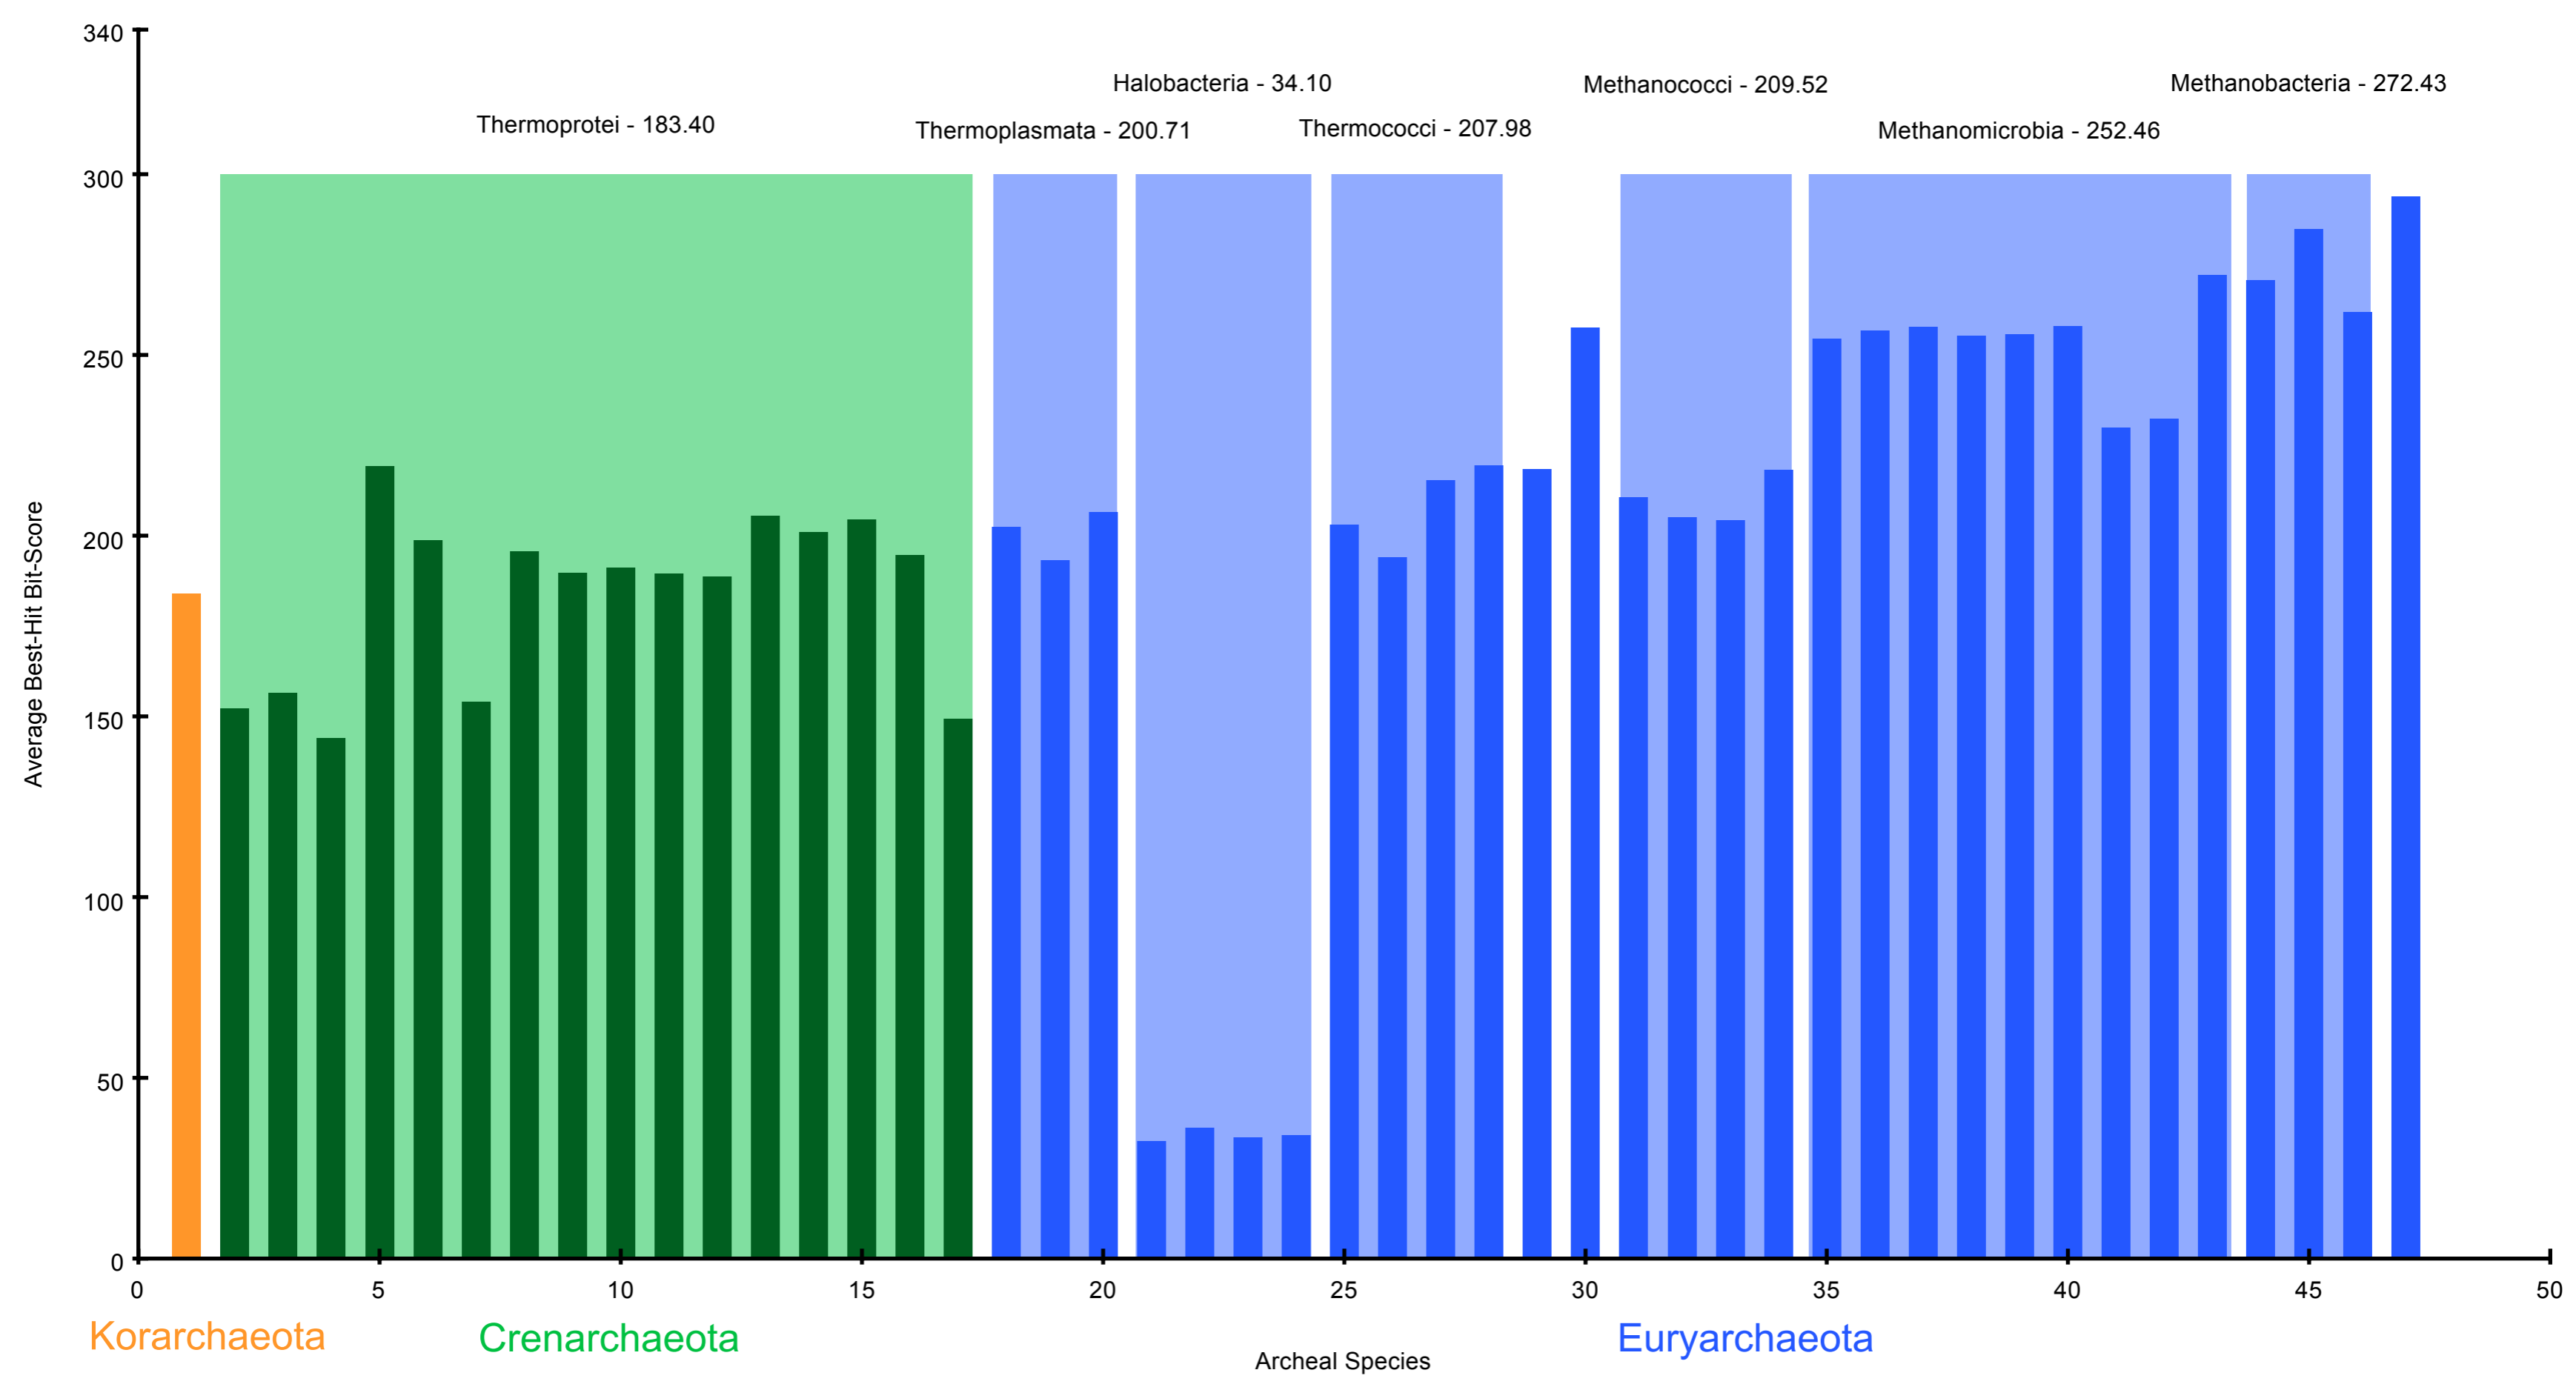

Supplement: pone.0013576.s002.pdf [file pone.0013576.s002.pdf]
