# Supplementary material for: Evolution of Bacterial Phosphoglycerate Mutases: Non-Homologous Isofunctional Enzymes Undergoing Gene Losses, Gains and Lateral Transfers
Source: PLoS One. 2010 Oct 26;5(10):e13576. doi: 10.1371/journal.pone.0013576 (PMC2964296; doi:10.1371/journal.pone.0013576)
Supplement: Table S1 — Identification of orthologs of iPGM, dPGM and related superfamily member proteins across 702 complete bacterial genomes. The protein queries are as described in Materials and Methods. The number of predicted proteins in each genome sequence that match the query protein above a TBLASTN bit score of 100 are provided. Based on these hits, each genome is assigned a status of either “I” (iPGM) “D” (dPGM), “D+I” (dPGM plus iPGM) or “None” (No PGM). The assignments were made automatically or manually as described in Materials and Methods. A plus sign (+) in the column headed “Multiple Molecules” indicates that the queried genome has more than one molecule and that the multiple hits are to different chromosomes or extrachromosomal plasmids. [However, Corynebacterium glutamicum ATCC 13032 and Bacillus licheniformis ATCC 14580 have been sequenced twice resulting in duplicate molecules and are also marked “+”; Burkholderia multivorans ATCC 17616, also sequenced twice, has 3 chromosomes and one plasmid and has 2 dPGM hits on chromosome 1 and is marked “+”. Similarly, Ehrlichia ruminantium str. Welgevonden has been sequenced twice (+) and has one iPGM hit on each sequence. However, the assignment of different origins in the E. ruminantium genome sequences results in the hits not overlapping so being scored twice]. (0.32 MB XLS) [file pone.0013576.s004.xls]

## Sheet: Data
Taxon Identifier	Taxonomic Group	Organism name	Genome size (bp)	dPGM Escherichia coli K12	Multiple Molecules	dPGM Chlamydia trachomatis	Multiple Molecules	dPGM Thermoplasma acidophilum	Multiple Molecules	iPGM Escherichia coli K12	Multiple Molecules	iPGM Ureaplasma parvum	Multiple Molecules	iPGM Pyrococcus furiosus	Multiple Molecules	dPGM2 (gpmB) Escherichia coli K12	Multiple Molecules	phoE Bacillus subtilis	Multiple Molecules	Acid Phosphatase Mycobacterium tuberculosis	Multiple Molecules	phosphopentomutase Escherichia coli K12	Multiple Molecules	Bacterial Alkaline Phosphatase Escherichia coli K12	Multiple Molecules	Automatic PGM Prediction	Manual PGM curation
204669	Acidobacteria	Acidobacteria bacterium Ellin345	5650368	0		0		0		1		1		0		0		0		0		0		0		I
351607	Actinobacteria	Acidothermus cellulolyticus 11B	2443540	1		1		0		0		0		0		0		0		0		0		0		D
290340	Actinobacteria	Arthrobacter aurescens TC1	5226648	1		1		0		0		0		0		0		1		1		0		0		D
290399	Actinobacteria	Arthrobacter sp. FB24	5070478	1		1		0		0		0		0		0		1		1		0		3	+	D
367928	Actinobacteria	Bifidobacterium adolescentis ATCC 15703	2089645	1		1		0		0		0		0		0		0		0		0		1		D
205913	Actinobacteria	Bifidobacterium longum DJO10A	2375792	1		1		0		0		0		0		0		0		0		0		0		D
206672	Actinobacteria	Bifidobacterium longum NCC2705	2260266	1		1		0		0		0		0		0		0		0		0		0		D
443906	Actinobacteria	Clavibacter michiganensis subsp. michiganensis NCPPB 382	3395237	1		1		0		0		0		0		0		0		1		0		0		D
31964	Actinobacteria	Clavibacter michiganensis subsp. sepedonicus	3403786	1		1		0		0		0		0		0		1		1		0		0		D
257309	Actinobacteria	Corynebacterium diphtheriae NCTC 13129	2488635	1		1		0		0		0		0		0		0		0		0		0		D
196164	Actinobacteria	Corynebacterium efficiens YS-314	3147090	1		1		0		0		0		0		0		0		0		0		0		D
196627	Actinobacteria	Corynebacterium glutamicum ATCC 13032	6592109	1	+	1	+	0		0		0		0		0		0		0		0		0		D
340322	Actinobacteria	Corynebacterium glutamicum R	3363299	1		1		0		0		0		0		0		0		0		0		0		D
306537	Actinobacteria	Corynebacterium jeikeium K411	2476822	1		1		0		0		0		0		0		0		0		0		0		D
504474	Actinobacteria	Corynebacterium urealyticum DSM 7109	2369219	1		1		0		0		0		0		0		0		0		0		0		D
326424	Actinobacteria	Frankia alni ACN14a	7497934	1		1		0		0		0		0		0		0		1		0		0		D
106370	Actinobacteria	Frankia sp. CcI3	5433628	1		1		0		0		0		0		0		0		0		0		0		D
298653	Actinobacteria	Frankia sp. EAN1pec	8982042	2		2		0		0		0		0		0		0		3		0		0			D
266940	Actinobacteria	Kineococcus radiotolerans SRS30216	4956672	1		1		0		0		0		0		0		1		0		0		2	+	D
378753	Actinobacteria	Kocuria rhizophila DC2201	2697540	1		1		0		0		0		0		0		1		0		0		0		D
281090	Actinobacteria	Leifsonia xyli subsp. xyli str. CTCB07	2584158	1		1		0		0		0		0		0		0		0		0		0		D
36809	Actinobacteria	Mycobacterium abscessus	5090491	1		1		0		0		0		0		0		0		1		0		1		D
243243	Actinobacteria	Mycobacterium avium 104	5475491	1		1		0		0		0		0		0		0		1		0		0		D
262316	Actinobacteria	Mycobacterium avium subsp. paratuberculosis K-10	4829781	1		1		0		0		0		0		0		0		1		0		0		D
233413	Actinobacteria	Mycobacterium bovis AF2122/97	4345492	1		1		0		0		0		0		0		0		1		0		0		D
410289	Actinobacteria	Mycobacterium bovis BCG str. Pasteur 1173P2	4374522	1		1		0		0		0		0		0		0		2		0		0		D
350054	Actinobacteria	Mycobacterium gilvum PYR-GCK	5982829	1		1		0		0		0		0		0		0		1		0		0		D
272631	Actinobacteria	Mycobacterium leprae TN	3268203	1		1		0		0		0		0		0		0		1		0		0		D
216594	Actinobacteria	Mycobacterium marinum M	6660144	1		1		0		0		0		0		0		0		1		0		0		D
246196	Actinobacteria	Mycobacterium smegmatis str. MC2 155	6988209	1		1		0		0		0		0		0		0		1		0		2		D
164757	Actinobacteria	Mycobacterium sp. JLS	6048425	1		1		0		0		0		0		0		0		1		0		0		D
189918	Actinobacteria	Mycobacterium sp. KMS	6256079	1		1		0		0		0		0		0		0		1		0		0		D
164756	Actinobacteria	Mycobacterium sp. MCS	5920523	1		1		0		0		0		0		0		0		1		0		0		D
83331	Actinobacteria	Mycobacterium tuberculosis CDC1551	4403837	1		1		0		0		0		0		0		0		1		0		0		D
336982	Actinobacteria	Mycobacterium tuberculosis F11	4424435	1		1		0		0		0		0		0		0		1		0		0		D
419947	Actinobacteria	Mycobacterium tuberculosis H37Ra	4419977	1		1		0		0		0		0		0		0		1		0		0		D
83332	Actinobacteria	Mycobacterium tuberculosis H37Rv	4411532	1		1		0		0		0		0		0		0		1		0		0		D
362242	Actinobacteria	Mycobacterium ulcerans Agy99	5631606	1		1		0		0		0		0		0		0		1		0		0		D
350058	Actinobacteria	Mycobacterium vanbaalenii PYR-1	6491865	1		1		0		0		0		0		0		0		1		0		0		D
247156	Actinobacteria	Nocardia farcinica IFM 10152	6292344	1		1		0		0		0		0		0		0		1		0		0		D
196162	Actinobacteria	Nocardioides sp. JS614	5293685	1		1		0		0		0		0		0		0		1		0		0		D
267747	Actinobacteria	Propionibacterium acnes KPA171202	2560265	1		1		0		0		0		0		0		0		0		0		0		D
288705	Actinobacteria	Renibacterium salmoninarum ATCC 33209	3155250	1		1		0		0		0		0		0		0		1		0		0		D
101510	Actinobacteria	Rhodococcus jostii RHA1	9702737	1		1		0		0		0		0		0		0		1		0		0		D
266117	Actinobacteria	Rubrobacter xylanophilus DSM 9941	3225748	0		0		0		0		0		1		0		0		0		1		0			I
405948	Actinobacteria	Saccharopolyspora erythraea NRRL 2338	8212805	1		1		0		0		0		0		0		0		1		0		0		D
391037	Actinobacteria	Salinispora arenicola CNS-205	5786361	1		1		0		0		0		0		0		0		1		0		0		D
369723	Actinobacteria	Salinispora tropica CNB-440	5183331	1		1		0		0		0		0		0		0		1		0		0		D
227882	Actinobacteria	Streptomyces avermitilis MA-4680	9119895	1		1		0		0		0		0		0		0		3		0		0		D
100226	Actinobacteria	Streptomyces coelicolor A3(2)	9054847	1		1		0		1		1		0		0		0		2		0		0		D+I
455632	Actinobacteria	Streptomyces griseus subsp. griseus NBRC 13350	8545929	1		1		0		0		0		0		0		0		2		0		1		D
269800	Actinobacteria	Thermobifida fusca YX	3642249	1		1		0		0		0		0		0		0		0		0		0		D
218496	Actinobacteria	Tropheryma whipplei TW08/27	925938	1		1		0		0		0		0		0		0		0		0		0		D
203267	Actinobacteria	Tropheryma whipplei str. Twist	927303	1		1		0		0		0		0		0		0		0		0		0		D
349163	Alphaproteobacteria	Acidiphilium cryptum JF-5	3963080	0		0		0		1		1		0		0		0		0		0		0		I
176299	Alphaproteobacteria	Agrobacterium tumefaciens str. C58	5674258	0		0		0		1		1		0		0		0		0		1		0		I
234826	Alphaproteobacteria	Anaplasma marginale str. St. Maries	1197687	0		0		0		1		1		0		0		0		0		0		0		I
212042	Alphaproteobacteria	Anaplasma phagocytophilum HZ	1471282	0		0		0		1		1		0		0		0		0		0		0		I
438753	Alphaproteobacteria	Azorhizobium caulinodans ORS 571	5369772	1		1		0		0		0		0		0		0		0		0		1		D
360095	Alphaproteobacteria	Bartonella bacilliformis KC583	1445021	1		1		0		0		0		0		0		0		0		0		0		D
283166	Alphaproteobacteria	Bartonella henselae str. Houston-1	1931047	1		1		0		0		0		0		0		0		0		0		0		D
283165	Alphaproteobacteria	Bartonella quintana str. Toulouse	1581384	1		1		0		0		0		0		0		0		0		0		0		D
382640	Alphaproteobacteria	Bartonella tribocorum CIP 105476	2642404	1		1		0		0		0		0		0		0		0		0		0		D
395963	Alphaproteobacteria	Beijerinckia indica subsp. indica ATCC 9039	4418616	1		1		0		0		0		0		0		0		0		0		0		D
224911	Alphaproteobacteria	Bradyrhizobium japonicum USDA 110	9105828	1		1		0		0		0		0		0		0		0		0		0		D
288000	Alphaproteobacteria	Bradyrhizobium sp. BTAi1	8493513	1		1		0		1		1		0		0		0		0		0		0		D+I
114615	Alphaproteobacteria	Bradyrhizobium sp. ORS278	7456587	1		1		0		0		0		0		0		0		0		1		0		D
430066	Alphaproteobacteria	Brucella abortus S19	3283936	1		1		0		0		0		0		0		0		0		0		1		D
262698	Alphaproteobacteria	Brucella abortus bv. 1 str. 9-941	3286445	1		1		0		0		0		0		0		0		0		0		1		D
483179	Alphaproteobacteria	Brucella canis ATCC 23365	3312769	1		1		0		0		0		0		0		0		0		0		1		D
224914	Alphaproteobacteria	Brucella melitensis 16M	3294931	1		1		0		0		0		0		0		0		0		0		1		D
359391	Alphaproteobacteria	Brucella melitensis biovar Abortus 2308	3278307	1		1		0		0		0		0		0		0		0		0		1		D
444178	Alphaproteobacteria	Brucella ovis ATCC 25840	3275590	1		1		0		0		0		0		0		0		0		0		1		D
204722	Alphaproteobacteria	Brucella suis 1330	3315175	1		1		0		0		0		0		0		0		0		0		1		D
470137	Alphaproteobacteria	Brucella suis ATCC 23445	3324607	1		1		0		0		0		0		0		0		0		0		1		D
335992	Alphaproteobacteria	Candidatus Pelagibacter ubique HTCC1062	1308759	1		1		0		0		0		0		0		0		0		0		0		D
190650	Alphaproteobacteria	Caulobacter crescentus CB15	4016947	1		1		0		0		0		0		0		0		0		0		0		D
366602	Alphaproteobacteria	Caulobacter sp. K31	5889399	1		1		0		0		0		0		0		0		0		0		1		D
398580	Alphaproteobacteria	Dinoroseobacter shibae DFL 12	4417868	0		0		0		1		1		0		0		0		0		1		0		I
269484	Alphaproteobacteria	Ehrlichia canis str. Jake	1315030	0		0		0		1		1		0		0		0		0		0		0		I
205920	Alphaproteobacteria	Ehrlichia chaffeensis str. Arkansas	1176248	0		0		0		1		1		0		0		0		0		0		0		I
302409	Alphaproteobacteria	Ehrlichia ruminantium str. Gardel	1499920	0		0		0		1		1		0		0		0		0		0		0		I
254945	Alphaproteobacteria	Ehrlichia ruminantium str. Welgevonden	3029332	0		0		0		2	+	2	+	0		0		0		0		0		0			I
314225	Alphaproteobacteria	Erythrobacter litoralis HTCC2594	3052398	1		1		0		0		0		0		0		0		0		0		1		D
272568	Alphaproteobacteria	Gluconacetobacter diazotrophicus PAl 5	3999591	0		0		0		1		1		0		0		0		0		0		0		I
290633	Alphaproteobacteria	Gluconobacter oxydans 621H	2922384	0		0		0		1		1		0		0		0		0		0		0		I
391165	Alphaproteobacteria	Granulibacter bethesdensis CGDNIH1	2708355	0		0		0		1		1		0		0		0		0		0		0		I
228405	Alphaproteobacteria	Hyphomonas neptunium ATCC 15444	3705021	1		1		0		0		0		0		0		0		0		0		1		D
290400	Alphaproteobacteria	Jannaschia sp. CCS1	4404049	0		0		0		1		1		0		0		0		0		1		0		I
342108	Alphaproteobacteria	Magnetospirillum magneticum AMB-1	4967148	0		0		0		1		1		0		0		0		0		0		0		I
394221	Alphaproteobacteria	Maricaulis maris MCS10	3368780	1		1		0		0		0		0		0		0		0		0		0		D
266835	Alphaproteobacteria	Mesorhizobium loti MAFF303099	7596297	1		1		0		0		0		0		0		0		1		1		0		D
266779	Alphaproteobacteria	Mesorhizobium sp. BNC1	4935185	1		1		0		0		0		0		0		0		0		1		0		D
419610	Alphaproteobacteria	Methylobacterium extorquens PA1	5471154	2		2		0		0		0		0		0		0		0		1		0			D
441620	Alphaproteobacteria	Methylobacterium populi BJ001	5848997	1		1		0		0		0		0		0		0		0		1		0		D
426355	Alphaproteobacteria	Methylobacterium radiotolerans JCM 2831	6899110	2		2		0		1		1		0		0		0		1		1		0			D+I
426117	Alphaproteobacteria	Methylobacterium sp. 4-46	7737025	1		1		0		0		0		0		0		0		0		1		1		D
222891	Alphaproteobacteria	Neorickettsia sennetsu str. Miyayama	859006	0		0		0		1		1		0		0		0		0		0		0		I
323097	Alphaproteobacteria	Nitrobacter hamburgensis X14	5011522	1		1		0		0		0		0		0		0		0		0		0		D
323098	Alphaproteobacteria	Nitrobacter winogradskyi Nb-255	3402093	1		1		0		0		0		0		0		0		0		0		0		D
279238	Alphaproteobacteria	Novosphingobium aromaticivorans DSM 12444	4233314	1		1		0		0		0		0		0		0		0		0		0		D
439375	Alphaproteobacteria	Ochrobactrum anthropi ATCC 49188	5205777	1		1		0		0		0		0		0		0		0		0		0		D
357244	Alphaproteobacteria	Orientia tsutsugamushi str. Boryong	2127051	0		0		0		0		0		0		0		0		0		0		0			None
334380	Alphaproteobacteria	Orientia tsutsugamushi str. Ikeda	2008987	0		0		0		0		0		0		0		0		0		0		0			None
318586	Alphaproteobacteria	Paracoccus denitrificans PD1222	5236194	0		0		0		1		1		0		0		0		0		1		0		I
402881	Alphaproteobacteria	Parvibaculum lavamentivorans DS-1	3914745	1		1		0		1		1		0		0		0		0		0		0		D+I
450851	Alphaproteobacteria	Phenylobacterium zucineum HLK1	4379231	3	+	3	+	0		0		0		0		0		0		0		0		0			D
347834	Alphaproteobacteria	Rhizobium etli CFN 42	6530228	2	+	2	+	0		0		0		0		0		0		1		1		1			D
491916	Alphaproteobacteria	Rhizobium etli CIAT 652	6448048	2	+	2	+	0		0		0		0		0		0		1		1		1			D
216596	Alphaproteobacteria	Rhizobium leguminosarum bv. viciae 3841	7751309	1		1		0		0		0		0		0		0		1		1		1		D
272943	Alphaproteobacteria	Rhodobacter sphaeroides 2.4.1	4603060	0		0		0		1		1		0		0		0		0		1		0		I
349102	Alphaproteobacteria	Rhodobacter sphaeroides ATCC 17025	4557127	0		0		0		1		1		0		0		0		0		1		0		I
349101	Alphaproteobacteria	Rhodobacter sphaeroides ATCC 17029	4489380	0		0		0		1		1		0		0		0		0		1		0		I
316055	Alphaproteobacteria	Rhodopseudomonas palustris BisA53	5505494	1		1		0		0		0		0		0		0		0		0		1		D
316056	Alphaproteobacteria	Rhodopseudomonas palustris BisB18	5513844	1		1		0		0		0		0		0		0		0		0		1		D
316057	Alphaproteobacteria	Rhodopseudomonas palustris BisB5	4892717	0		0		0		1		1		0		0		0		0		0		1		I
258594	Alphaproteobacteria	Rhodopseudomonas palustris CGA009	5467640	0		0		0		1		1		0		0		0		0		0		1		I
316058	Alphaproteobacteria	Rhodopseudomonas palustris HaA2	5331656	0		0		0		1		1		0		0		0		0		0		1		I
395960	Alphaproteobacteria	Rhodopseudomonas palustris TIE-1	5744041	0		0		0		1		1		0		0		0		0		0		1		I
269796	Alphaproteobacteria	Rhodospirillum rubrum ATCC 11170	4406557	0		0		0		1		1		0		0		0		0		0		1		I
293614	Alphaproteobacteria	Rickettsia akari str. Hartford	1231060	0		0		0		0		0		0		0		0		0		0		0			None
391896	Alphaproteobacteria	Rickettsia bellii OSU 85-389	1528980	0		0		0		0		0		0		0		0		0		0		0			None
336407	Alphaproteobacteria	Rickettsia bellii RML369-C	1522076	0		0		0		0		0		0		0		0		0		0		0			None
293613	Alphaproteobacteria	Rickettsia canadensis str. McKiel	1159772	0		0		0		0		0		0		0		0		0		0		0			None
272944	Alphaproteobacteria	Rickettsia conorii str. Malish 7	1268755	0		0		0		0		0		0		0		0		0		0		0			None
315456	Alphaproteobacteria	Rickettsia felis URRWXCal2	1587240	0		0		0		0		0		0		0		0		0		0		0			None
416276	Alphaproteobacteria	Rickettsia massiliae MTU5	1376184	0		0		0		0		0		0		0		0		0		0		0			None
272947	Alphaproteobacteria	Rickettsia prowazekii str. Madrid E	1111523	0		0		0		0		0		0		0		0		0		0		0			None
392021	Alphaproteobacteria	Rickettsia rickettsii str. 'Sheila Smith'	1257710	0		0		0		0		0		0		0		0		0		0		0			None
452659	Alphaproteobacteria	Rickettsia rickettsii str. Iowa	1268175	0		0		0		0		0		0		0		0		0		0		0			None
257363	Alphaproteobacteria	Rickettsia typhi str. Wilmington	1111496	0		0		0		0		0		0		0		0		0		0		0			None
375451	Alphaproteobacteria	Roseobacter denitrificans OCh 114	4331234	0		0		0		1		1		0		0		0		0		1		0		I
246200	Alphaproteobacteria	Silicibacter pomeroyi DSS-3	4601053	0		0		0		1		1		0		0		0		0		1		0		I
292414	Alphaproteobacteria	Silicibacter sp. TM1040	4153699	0		0		0		1		1		0		0		0		0		1		0		I
366394	Alphaproteobacteria	Sinorhizobium medicae WSM419	6817576	1		1		0		0		0		0		0		0		1		1		0		D
266834	Alphaproteobacteria	Sinorhizobium meliloti 1021	6691694	1		1		0		0		0		0		0		0		0		1		0		D
392499	Alphaproteobacteria	Sphingomonas wittichii RW1	5915246	1		1		0		0		0		0		0		0		0		0		0		D
317655	Alphaproteobacteria	Sphingopyxis alaskensis RB2256	3373713	1		1		0		0		0		0		0		0		0		0		0		D
570417	Alphaproteobacteria	Wolbachia endosymbiont of Culex quinquefasciatus Pel	1482455	0		0		0		1		1		0		0		0		0		0		0		I
163164	Alphaproteobacteria	Wolbachia endosymbiont of Drosophila melanogaster	1267782	0		0		0		1		1		0		0		0		0		0		0		I
292805	Alphaproteobacteria	Wolbachia endosymbiont strain TRS of Brugia malayi	1080084	0		0		0		1		1		0		0		0		0		0		0		I
78245	Alphaproteobacteria	Xanthobacter autotrophicus Py2	5625098	1		1		0		0		0		0		0		0		0		0		0		D
264203	Alphaproteobacteria	Zymomonas mobilis subsp. mobilis ZM4	2056416	1		1		0		0		0		0		0		0		0		0		0		D
224324	Aquificae	Aquifex aeolicus VF5	1590791	0		0		0		0		0		1		0		0		0		0		0			I
380749	Aquificae	Hydrogenobaculum sp. Y04AAS1	1559514	1		1		0		0		0		0		0		0		0		0		0		D
436114	Aquificae	Sulfurihydrogenibium sp. YO3AOP1	1838442	1		1		0		0		0		0		0		0		0		0		0		D
326423	Bacilli	Bacillus amyloliquefaciens FZB42	3918589	0		0		0		1		1		0		0		1		0		1		1		I
261594	Bacilli	Bacillus anthracis str. 'Ames Ancestor'	5503926	1		1		0		1		1		0		0		1		0		1		2		D+I
198094	Bacilli	Bacillus anthracis str. Ames	5227293	1		1		0		1		1		0		0		1		0		1		2		D+I
260799	Bacilli	Bacillus anthracis str. Sterne	5228663	1		1		0		1		1		0		0		1		0		1		2		D+I
222523	Bacilli	Bacillus cereus ATCC 10987	5432652	2		2		0		1		1		0		0		1		0		1		2			D+I
226900	Bacilli	Bacillus cereus ATCC 14579	5427083	1		1		0		1		1		0		0		1		0		1		2		D+I
288681	Bacilli	Bacillus cereus E33L	5843235	1		1		0		1		1		0		0		1		0		1		2		D+I
315749	Bacilli	Bacillus cereus subsp. cytotoxis NVH 391-98	4094159	1		1		0		1		1		0		0		1		0		1		1		D+I
66692	Bacilli	Bacillus clausii KSM-K16	4303871	0		0		0		1		1		0		0		0		0		2		1		I
272558	Bacilli	Bacillus halodurans C-125	4202352	0		0		0		1		1		0		0		0		0		2		1		I
279010	Bacilli	Bacillus licheniformis ATCC 14580	8445242	0		0		0		1	+	1	+	0		0		1	+	0		2	+	0		I
315750	Bacilli	Bacillus pumilus SAFR-032	3704465	0		0		0		1		1		0		0		1		0		1		2		I
224308	Bacilli	Bacillus subtilis subsp. subtilis str. 168	4214630	0		0		0		1		1		0		0		1		0		1		2		I
281309	Bacilli	Bacillus thuringiensis serovar konkukian str. 97-27	5314794	1		1		0		1		1		0		0		1		0		1		2		D+I
412694	Bacilli	Bacillus thuringiensis str. Al Hakam	5313030	1		1		0		1		1		0		0		2		0		1		2		D+I
315730	Bacilli	Bacillus weihenstephanensis KBAB4	5872743	1		1		0		1		1		0		0		1		0		1		2		D+I
226185	Bacilli	Enterococcus faecalis V583	3359974	1		1		0		0		0		0		0		0		0		1		1		D
262543	Bacilli	Exiguobacterium sibiricum 255-15	3040786	0		0		0		1		1		0		0		1		0		1		1		I
235909	Bacilli	Geobacillus kaustophilus HTA426	3592666	0		0		0		1		1		0		0		0		0		1		1		I
420246	Bacilli	Geobacillus thermodenitrificans NG80-2	3608012	0		0		0		1		1		0		0		0		0		1		1		I
272621	Bacilli	Lactobacillus acidophilus NCFM	1993560	2		2		0		0		0		0		0		0		0		0		0			D
387344	Bacilli	Lactobacillus brevis ATCC 367	2340228	2		2		0		0		0		0		0		0		0		1		0			D
321967	Bacilli	Lactobacillus casei ATCC 334	2924325	2		2		0		0		0		0		0		0		0		3		0			D
543734	Bacilli	Lactobacillus casei BL23	3079196	2		2		0		0		0		0		0		0		0		2		0			D
390333	Bacilli	Lactobacillus delbrueckii subsp. bulgaricus ATCC 11842	1864998	2		2		0		0		0		0		0		0		0		0		0			D
321956	Bacilli	Lactobacillus delbrueckii subsp. bulgaricus ATCC BAA-365	1856951	2		2		0		0		0		0		0		0		0		0		0			D
334390	Bacilli	Lactobacillus fermentum IFO 3956	2098685	2		2		0		0		0		0		0		0		0		0		0			D
324831	Bacilli	Lactobacillus gasseri ATCC 33323	1894360	2		2		0		0		0		0		0		0		0		0		0			D
405566	Bacilli	Lactobacillus helveticus DPC 4571	2080931	2		2		0		0		0		0		0		0		0		0		0			D
257314	Bacilli	Lactobacillus johnsonii NCC 533	1992676	2		2		0		0		0		0		0		0		0		0		0			D
220668	Bacilli	Lactobacillus plantarum WCFS1	3348625	2		2		0		0		0		0		0		0		0		0		0			D
557436	Bacilli	Lactobacillus reuteri DSM 20016	1999618	2		2		0		0		0		0		0		0		0		2		0			D
557433	Bacilli	Lactobacillus reuteri JCM 1112	2039414	2		2		0		0		0		0		0		0		0		2		0			D
314315	Bacilli	Lactobacillus sakei subsp. sakei 23K	1884661	2		2		0		0		0		0		0		0		0		1		0			D
362948	Bacilli	Lactobacillus salivarius UCC118	2133977	2		2		0		0		0		0		0		0		0		0		0			D
416870	Bacilli	Lactococcus lactis subsp. cremoris MG1363	2529478	1		1		0		0		0		0		0		0		0		1		0		D
272622	Bacilli	Lactococcus lactis subsp. cremoris SK11	2598348	1		1		0		0		0		0		0		0		0		1		0		D
272623	Bacilli	Lactococcus lactis subsp. lactis Il1403	2365589	1		1		0		0		0		0		0		0		0		1		0		D
349519	Bacilli	Leuconostoc citreum KM20	1896614	2		2		0		0		0		0		0		0		0		0		0			D
203120	Bacilli	Leuconostoc mesenteroides subsp. mesenteroides ATCC 8293	2075763	2		2		0		0		0		0		0		0		0		0		0			D
272626	Bacilli	Listeria innocua Clip11262	3093113	1		1		0		1		1		0		0		0		0		1		0		D+I
169963	Bacilli	Listeria monocytogenes EGD-e	2944528	1		1		0		1		1		0		0		0		0		1		0		D+I
265669	Bacilli	Listeria monocytogenes str. 4b F2365	2905187	1		1		0		1		1		0		0		0		0		1		0		D+I
386043	Bacilli	Listeria welshimeri serovar 6b str. SLCC5334	2814130	1		1		0		1		1		0		0		0		0		1		0		D+I
444177	Bacilli	Lysinibacillus sphaericus C3-41	4817463	0		0		0		1		1		0		0		0		0		1		1		I
221109	Bacilli	Oceanobacillus iheyensis HTE831	3630528	0		0		0		1		1		0		0		1		0		1		1		I
203123	Bacilli	Oenococcus oeni PSU-1	1780517	2		2		0		0		0		0		0		0		0		0		0			D
278197	Bacilli	Pediococcus pentosaceus ATCC 25745	1832387	2		2		0		0		0		0		0		0		0		0		0			D
273036	Bacilli	Staphylococcus aureus RF122	2742531	1		1		0		1		1		0		0		0		0		1		1		D+I
93062	Bacilli	Staphylococcus aureus subsp. aureus COL	2813862	1		1		0		1		1		0		0		0		0		1		1		D+I
359787	Bacilli	Staphylococcus aureus subsp. aureus JH1	2936936	1		1		0		1		1		0		0		0		0		1		1		D+I
359786	Bacilli	Staphylococcus aureus subsp. aureus JH9	2937129	1		1		0		1		1		0		0		0		0		1		1		D+I
282458	Bacilli	Staphylococcus aureus subsp. aureus MRSA252	2902619	1		1		0		1		1		0		0		0		0		1		1		D+I
282459	Bacilli	Staphylococcus aureus subsp. aureus MSSA476	2820454	1		1		0		1		1		0		0		0		0		1		1		D+I
196620	Bacilli	Staphylococcus aureus subsp. aureus MW2	2820462	1		1		0		1		1		0		0		0		0		1		1		D+I
418127	Bacilli	Staphylococcus aureus subsp. aureus Mu3	2880168	1		1		0		1		1		0		0		0		0		1		1		D+I
158878	Bacilli	Staphylococcus aureus subsp. aureus Mu50	2903636	1		1		0		1		1		0		0		0		0		1		1		D+I
158879	Bacilli	Staphylococcus aureus subsp. aureus N315	2839469	1		1		0		1		1		0		0		0		0		1		1		D+I
93061	Bacilli	Staphylococcus aureus subsp. aureus NCTC 8325	2821361	1		1		0		1		1		0		0		0		0		1		1		D+I
367830	Bacilli	Staphylococcus aureus subsp. aureus USA300	2917469	1		1		0		1		1		0		0		0		0		1		1		D+I
451516	Bacilli	Staphylococcus aureus subsp. aureus USA300_TCH1516	2899956	1		1		0		1		1		0		0		0		0		1		1		D+I
426430	Bacilli	Staphylococcus aureus subsp. aureus str. Newman	2878897	1		1		0		1		1		0		0		0		0		1		1		D+I
176280	Bacilli	Staphylococcus epidermidis ATCC 12228	2564615	1		1		0		1		1		0		0		0		0		1		1		D+I
176279	Bacilli	Staphylococcus epidermidis RP62A	2643840	1		1		0		1		1		0		0		0		0		1		1		D+I
279808	Bacilli	Staphylococcus haemolyticus JCSC1435	2685015	1		1		0		1		1		0		0		0		0		1		1		D+I
342451	Bacilli	Staphylococcus saprophyticus subsp. saprophyticus ATCC 15305	2577899	1		1		0		1		1		0		0		0		0		1		1		D+I
208435	Bacilli	Streptococcus agalactiae 2603V/R	2160267	1		1		0		0		0		0		0		0		0		2		0		D
205921	Bacilli	Streptococcus agalactiae A909	2127839	1		1		0		0		0		0		0		0		0		2		0		D
211110	Bacilli	Streptococcus agalactiae NEM316	2211485	1		1		0		0		0		0		0		0		0		2		0		D
552526	Bacilli	Streptococcus equi subsp. zooepidemicus MGCS10565	2024171	1		1		0		0		0		0		0		0		0		1		0		D
467705	Bacilli	Streptococcus gordonii str. Challis substr. CH1	2196662	1		1		0		0		0		0		0		0		0		1		0		D
210007	Bacilli	Streptococcus mutans UA159	2030921	1		1		0		0		0		0		0		0		0		1		0		D
516950	Bacilli	Streptococcus pneumoniae CGSP14	2209198	1		1		0		0		0		0		0		0		0		1		0		D
373153	Bacilli	Streptococcus pneumoniae D39	2046115	1		1		0		0		0		0		0		0		0		1		0		D
512566	Bacilli	Streptococcus pneumoniae G54	2078953	1		1		0		0		0		0		0		0		0		1		0		D
487214	Bacilli	Streptococcus pneumoniae Hungary19A-6	2245615	1		1		0		0		0		0		0		0		0		1		0		D
171101	Bacilli	Streptococcus pneumoniae R6	2038615	1		1		0		0		0		0		0		0		0		1		0		D
170187	Bacilli	Streptococcus pneumoniae TIGR4	2160842	1		1		0		0		0		0		0		0		0		1		0		D
160490	Bacilli	Streptococcus pyogenes M1 GAS	1852441	1		1		0		0		0		0		0		0		0		1		0		D
370552	Bacilli	Streptococcus pyogenes MGAS10270	1928252	1		1		0		0		0		0		0		0		0		1		0		D
286636	Bacilli	Streptococcus pyogenes MGAS10394	1899877	1		1		0		0		0		0		0		0		0		1		0		D
370554	Bacilli	Streptococcus pyogenes MGAS10750	1937111	1		1		0		0		0		0		0		0		0		1		0		D
370553	Bacilli	Streptococcus pyogenes MGAS2096	1860355	1		1		0		0		0		0		0		0		0		1		0		D
198466	Bacilli	Streptococcus pyogenes MGAS315	1900521	1		1		0		0		0		0		0		0		0		1		0		D
293653	Bacilli	Streptococcus pyogenes MGAS5005	1838554	1		1		0		0		0		0		0		0		0		1		0		D
319701	Bacilli	Streptococcus pyogenes MGAS6180	1897573	1		1		0		0		0		0		0		0		0		1		0		D
186103	Bacilli	Streptococcus pyogenes MGAS8232	1895017	1		1		0		0		0		0		0		0		0		1		0		D
370551	Bacilli	Streptococcus pyogenes MGAS9429	1836467	1		1		0		0		0		0		0		0		0		1		0		D
193567	Bacilli	Streptococcus pyogenes SSI-1	1894275	1		1		0		0		0		0		0		0		0		1		0		D
160491	Bacilli	Streptococcus pyogenes str. Manfredo	1841271	1		1		0		0		0		0		0		0		0		1		0		D
388919	Bacilli	Streptococcus sanguinis SK36	2388435	1		1		0		0		0		0		0		0		0		1		0		D
391295	Bacilli	Streptococcus suis 05ZYH33	2096309	1		1		0		0		0		0		0		0		0		1		0		D
391296	Bacilli	Streptococcus suis 98HAH33	2095698	1		1		0		0		0		0		0		0		0		1		0		D
299768	Bacilli	Streptococcus thermophilus CNRZ1066	1796226	1		1		0		0		0		0		0		0		0		1		0		D
322159	Bacilli	Streptococcus thermophilus LMD-9	1864178	1		1		0		0		0		0		0		0		0		1		0		D
264199	Bacilli	Streptococcus thermophilus LMG 18311	1796846	1		1		0		0		0		0		0		0		0		1		0		D
272559	Bacteroidetes	Bacteroides fragilis NCTC 9343	5241700	1		1		0		1		1		1		0		0		0		0		0		D+I
295405	Bacteroidetes	Bacteroides fragilis YCH46	5310990	1		1		0		1		1		1		0		0		0		0		0		D+I
226186	Bacteroidetes	Bacteroides thetaiotaomicron VPI-5482	6293399	2		2		0		1		1		1		0		0		0		0		0			D+I
435590	Bacteroidetes	Bacteroides vulgatus ATCC 8482	5163189	2		2		0		1		1		1		0		0		0		0		0			D+I
452471	Bacteroidetes	Candidatus Amoebophilus asiaticus 5a2	1884364	0		0		0		1		1		0		0		0		0		0		0		I
435591	Bacteroidetes	Parabacteroides distasonis ATCC 8503	4811379	1		1		0		1		1		1		0		0		0		0		1		D+I
431947	Bacteroidetes	Porphyromonas gingivalis ATCC 33277	2354886	1		1		0		0		0		0		0		0		0		0		0		D
242619	Bacteroidetes	Porphyromonas gingivalis W83	2343476	1		1		0		0		0		0		0		0		0		0		0		D
397945	Betaproteobacteria	Acidovorax avenae subsp. citrulli AAC00-1	5352772	1		1		0		0		0		0		0		0		0		0		0		D
232721	Betaproteobacteria	Acidovorax sp. JS42	4585154	1		1		0		0		0		0		0		0		0		0		0		D
76114	Betaproteobacteria	Aromatoleum aromaticum EbN1	4727255	1		1		0		0		0		0		0		0		0		0		0		D
62928	Betaproteobacteria	Azoarcus sp. BH72	4376040	1		1		0		0		0		0		0		0		0		0		1		D
360910	Betaproteobacteria	Bordetella avium 197N	3732255	1		1		0		0		0		0		0		0		0		0		0		D
257310	Betaproteobacteria	Bordetella bronchiseptica RB50	5339179	1		1		0		0		0		0		0		0		0		0		0		D
257311	Betaproteobacteria	Bordetella parapertussis 12822	4773551	1		1		0		0		0		0		0		0		0		0		0		D
257313	Betaproteobacteria	Bordetella pertussis Tohama I	4086189	1		1		0		0		0		0		0		0		0		0		0		D
340100	Betaproteobacteria	Bordetella petrii DSM 12804	5287950	1		1		0		0		0		0		0		0		0		0		0		D
339670	Betaproteobacteria	Burkholderia ambifaria AMMD	7528567	1		1		0		0		0		0		0		0		0		0		0		D
398577	Betaproteobacteria	Burkholderia ambifaria MC40-6	7642536	1		1		0		0		0		0		0		0		0		0		0		D
331271	Betaproteobacteria	Burkholderia cenocepacia AU 1054	7279116	1		1		0		0		0		0		0		0		0		0		0		D
331272	Betaproteobacteria	Burkholderia cenocepacia HI2424	7702840	1		1		0		0		0		0		0		0		0		0		0		D
216591	Betaproteobacteria	Burkholderia cenocepacia J2315	8055782	1		1		0		0		0		0		0		0		0		0		2		D
406425	Betaproteobacteria	Burkholderia cenocepacia MC0-3	7971389	1		1		0		0		0		0		0		0		0		0		0		D
243160	Betaproteobacteria	Burkholderia mallei ATCC 23344	5835527	1		1		0		0		0		0		0		0		0		0		1		D
412022	Betaproteobacteria	Burkholderia mallei NCTC 10229	5742303	1		1		0		0		0		0		0		0		0		0		1		D
320389	Betaproteobacteria	Burkholderia mallei NCTC 10247	5848380	1		1		0		0		0		0		0		0		0		0		1		D
320388	Betaproteobacteria	Burkholderia mallei SAVP1	5232401	1		1		0		0		0		0		0		0		0		0		1		D
395019	Betaproteobacteria	Burkholderia multivorans ATCC 17616	14017432	2	+	2	+	0		0		0		0		0		0		0		0		0			D
391038	Betaproteobacteria	Burkholderia phymatum STM815	8676562	1		1		0		0		0		0		0		0		0		0		0		D
398527	Betaproteobacteria	Burkholderia phytofirmans PsJN	8214658	1		1		0		0		0		0		1		0		0		0		0		D
357348	Betaproteobacteria	Burkholderia pseudomallei 1106a	7089249	1		1		0		0		0		0		0		0		0		0		1		D
320372	Betaproteobacteria	Burkholderia pseudomallei 1710b	7308054	1		1		0		0		0		0		0		0		0		0		1		D
320373	Betaproteobacteria	Burkholderia pseudomallei 668	7040403	1		1		0		0		0		0		0		0		0		0		1		D
272560	Betaproteobacteria	Burkholderia pseudomallei K96243	7247547	1		1		0		0		0		0		0		0		0		0		1		D
269483	Betaproteobacteria	Burkholderia sp. 383	8676277	1		1		0		0		0		0		0		0		0		0		2		D
271848	Betaproteobacteria	Burkholderia thailandensis E264	6723972	1		1		0		0		0		0		0		0		0		0		1		D
269482	Betaproteobacteria	Burkholderia vietnamiensis G4	8391070	1		1		0		0		0		0		0		0		0		0		0		D
266265	Betaproteobacteria	Burkholderia xenovorans LB400	9731138	2	+	2	+	0		0		0		0		1		0		0		0		0			D
243365	Betaproteobacteria	Chromobacterium violaceum ATCC 12472	4751080	0		0		0		1		1		0		0		0		0		1		2		I
164546	Betaproteobacteria	Cupriavidus taiwanensis	6476522	1		1		0		0		0		0		1		0		0		0		0		D
159087	Betaproteobacteria	Dechloromonas aromatica RCB	4501104	0		0		0		1		1		0		0		1		0		0		1		I
398578	Betaproteobacteria	Delftia acidovorans SPH-1	6767514	1		1		0		0		0		0		0		0		0		0		2		D
204773	Betaproteobacteria	Herminiimonas arsenicoxydans	3424307	2		2		0		0		0		0		0		0		0		0		0			D
375286	Betaproteobacteria	Janthinobacterium sp. Marseille	4110251	2		2		0		0		0		0		0		0		0		0		0			D
395495	Betaproteobacteria	Leptothrix cholodnii SP-6	4909403	1		1		0		0		0		0		0		0		0		0		0		D
420662	Betaproteobacteria	Methylibium petroleiphilum PM1	4643639	1		1		0		0		0		0		1		0		0		0		0		D
265072	Betaproteobacteria	Methylobacillus flagellatus KT	2971517	0		0		0		1		1		0		0		0		0		0		1		I
242231	Betaproteobacteria	Neisseria gonorrhoeae FA 1090	2153922	1		1		0		0		0		0		0		0		0		0		0		D
521006	Betaproteobacteria	Neisseria gonorrhoeae NCCP11945	2236178	1		1		0		0		0		0		0		0		0		0		0		D
374833	Betaproteobacteria	Neisseria meningitidis 053442	2153416	1		1		0		0		0		0		0		0		0		0		0		D
272831	Betaproteobacteria	Neisseria meningitidis FAM18	2194961	1		1		0		0		0		0		0		0		0		0		0		D
122586	Betaproteobacteria	Neisseria meningitidis MC58	2272360	1		1		0		0		0		0		0		0		0		0		0		D
122587	Betaproteobacteria	Neisseria meningitidis Z2491	2184406	1		1		0		0		0		0		0		0		0		0		0		D
228410	Betaproteobacteria	Nitrosomonas europaea ATCC 19718	2812094	2		2		0		0		0		0		0		0		0		0		0			D
335283	Betaproteobacteria	Nitrosomonas eutropha C91	2781824	2		2		0		0		0		0		0		0		0		0		0			D
323848	Betaproteobacteria	Nitrosospira multiformis ATCC 25196	3234309	2		2		0		0		0		0		0		0		0		0		0			D
365044	Betaproteobacteria	Polaromonas naphthalenivorans CJ2	5366143	1		1		0		0		0		0		0		0		0		0		0		D
296591	Betaproteobacteria	Polaromonas sp. JS666	5898676	1		1		0		0		0		0		0		0		0		0		0		D
312153	Betaproteobacteria	Polynucleobacter necessarius subsp. asymbioticus QLW-P1DMWA-1	2159490	1		1		0		0		0		0		0		1		0		0		1		D
452638	Betaproteobacteria	Polynucleobacter necessarius subsp. necessarius STIR1	1560469	1		1		0		0		0		0		0		0		0		0		0		D
381666	Betaproteobacteria	Ralstonia eutropha H16	7416678	1		1		0		0		0		0		1		0		0		0		2		D
264198	Betaproteobacteria	Ralstonia eutropha JMP134	7255290	1		1		0		0		0		0		1		0		0		0		0		D
266264	Betaproteobacteria	Ralstonia metallidurans CH34	6913352	1		1		0		0		0		0		1		0		0		0		2		D
402626	Betaproteobacteria	Ralstonia pickettii 12J	5325729	1		1		0		0		0		0		1		0		0		0		2		D
267608	Betaproteobacteria	Ralstonia solanacearum GMI1000	5810922	1		1		0		0		0		0		0		0		0		0		1		D
338969	Betaproteobacteria	Rhodoferax ferrireducens T118	4969784	1		1		0		0		0		0		0		0		0		0		0		D
292415	Betaproteobacteria	Thiobacillus denitrificans ATCC 25259	2909809	0		0		0		1		1		0		0		0		0		0		0		I
391735	Betaproteobacteria	Verminephrobacter eiseniae EF01-2	5597943	1		1		0		0		0		0		0		0		0		0		0		D
264201	Chlamydiae	Candidatus Protochlamydia amoebophila UWE25	2414465	1		1		0		0		0		0		0		0		0		0		0		D
243161	Chlamydiae	Chlamydia muridarum Nigg	1080451	1		1		0		0		0		0		0		0		0		0		0		D
471472	Chlamydiae	Chlamydia trachomatis 434/Bu	1038842	1		1		0		0		0		0		0		0		0		0		0		D
315277	Chlamydiae	Chlamydia trachomatis A/HAR-13	1051969	1		1		0		0		0		0		0		0		0		0		0		D
272561	Chlamydiae	Chlamydia trachomatis D/UW-3/CX	1042519	1		1		0		0		0		0		0		0		0		0		0		D
471473	Chlamydiae	Chlamydia trachomatis L2b/UCH-1/proctitis	1038869	1		1		0		0		0		0		0		0		0		0		0		D
218497	Chlamydiae	Chlamydophila abortus S26/3	1144377	1		1		0		0		0		0		0		0		0		0		0		D
227941	Chlamydiae	Chlamydophila caviae GPIC	1181356	1		1		0		0		0		0		0		0		0		0		0		D
264202	Chlamydiae	Chlamydophila felis Fe/C-56	1173791	1		1		0		0		0		0		0		0		0		0		0		D
115711	Chlamydiae	Chlamydophila pneumoniae AR39	1229853	1		1		0		0		0		0		0		0		0		0		0		D
115713	Chlamydiae	Chlamydophila pneumoniae CWL029	1230230	1		1		0		0		0		0		0		0		0		0		0		D
138677	Chlamydiae	Chlamydophila pneumoniae J138	1226565	1		1		0		0		0		0		0		0		0		0		0		D
182082	Chlamydiae	Chlamydophila pneumoniae TW-183	1225935	1		1		0		0		0		0		0		0		0		0		0		D
517417	Chlorobia	Chlorobaculum parvum NCIB 8327	2289249	1		1		0		0		0		0		0		0		0		0		0		D
340177	Chlorobia	Chlorobium chlorochromatii CaD3	2572079	1		1		0		0		0		0		0		0		0		0		0		D
290315	Chlorobia	Chlorobium limicola DSM 245	2763181	1		1		0		0		0		0		0		0		0		0		0		D
331678	Chlorobia	Chlorobium phaeobacteroides BS1	2736403	1		1		0		0		0		0		0		0		0		0		0		D
290317	Chlorobia	Chlorobium phaeobacteroides DSM 266	3133902	1		1		0		0		0		0		0		0		0		0		0		D
290318	Chlorobia	Chlorobium phaeovibrioides DSM 265	1966858	1		1		0		0		0		0		0		0		0		0		0		D
194439	Chlorobia	Chlorobium tepidum TLS	2154946	1		1		0		0		0		0		0		0		0		0		0		D
517418	Chlorobia	Chloroherpeton thalassium ATCC 35110	3293456	1		1		0		0		0		0		0		0		0		0		0		D
319225	Chlorobia	Pelodictyon luteolum DSM 273	2364842	1		1		0		0		0		0		0		0		0		0		0		D
324925	Chlorobia	Pelodictyon phaeoclathratiforme BU-1	3018238	1		1		0		0		0		0		0		0		0		0		0		D
290512	Chlorobia	Prosthecochloris aestuarii DSM 271	2579695	1		1		0		0		0		0		0		0		0		0		0		D
324602	Chloroflexi	Chloroflexus aurantiacus J-10-fl	5258541	0		0		0		1		1		0		0		0		0		0		0		I
316274	Chloroflexi	Herpetosiphon aurantiacus ATCC 23779	6785430	0		0		0		1		1		0		0		0		0		1		0		I
383372	Chloroflexi	Roseiflexus castenholzii DSM 13941	5723298	0		0		0		1		1		0		0		0		0		0		0		I
357808	Chloroflexi	Roseiflexus sp. RS-1	5801598	0		0		0		1		1		0		0		0		0		0		0		I
43989	Chroococcales	Cyanothece sp. ATCC 51142	5460377	2	+	2	+	0		1		1		0		0		0		0		0		1			D+I
449447	Chroococcales	Microcystis aeruginosa NIES-843	5842795	0		0		0		1		1		0		0		0		0		0		0		I
269084	Chroococcales	Synechococcus elongatus PCC 6301	2696255	0		0		0		1		1		0		0		0		0		0		0		I
1140	Chroococcales	Synechococcus elongatus PCC 7942	2742269	0		0		0		1		1		0		0		0		0		0		0		I
64471	Chroococcales	Synechococcus sp. CC9311	2606748	0		0		0		1		1		0		0		0		1		0		0		I
110662	Chroococcales	Synechococcus sp. CC9605	2510659	0		0		0		1		1		0		0		0		0		0		0		I
316279	Chroococcales	Synechococcus sp. CC9902	2234828	0		0		0		1		1		0		0		0		1		0		0		I
321332	Chroococcales	Synechococcus sp. JA-2-3B'a(2-13)	3046682	0		0		0		1		1		0		0		0		0		0		0		I
321327	Chroococcales	Synechococcus sp. JA-3-3Ab	2932766	0		0		0		1		1		0		0		0		0		0		0		I
32049	Chroococcales	Synechococcus sp. PCC 7002	3409935	0		0		0		1		1		0		0		0		0		0		0		I
316278	Chroococcales	Synechococcus sp. RCC307	2224914	0		0		0		1		1		0		0		0		1		0		0		I
32051	Chroococcales	Synechococcus sp. WH 7803	2366980	0		0		0		1		1		0		0		0		1		0		0		I
84588	Chroococcales	Synechococcus sp. WH 8102	2434428	0		0		0		1		1		0		0		0		1		0		0		I
1148	Chroococcales	Synechocystis sp. PCC 6803	3947019	0		0		0		1		1		0		0		0		0		0		0		I
197221	Chroococcales	Thermosynechococcus elongatus BP-1	2593857	0		0		0		1		1		0		0		0		0		0		0		I
293826	Clostridia	Alkaliphilus metalliredigens QYMF	4929566	0		0		0		1		1		0		1		0		0		1		0		I
350688	Clostridia	Alkaliphilus oremlandii OhILAs	3123558	0		0		0		1		1		0		0		0		0		1		0		I
351627	Clostridia	Caldicellulosiruptor saccharolyticus DSM 8903	2970275	0		0		0		1		1		0		0		0		0		1		1		I
477974	Clostridia	Candidatus Desulforudis audaxviator MP104C	2349476	0		0		0		1		1		1		0		0		0		1		0		I
246194	Clostridia	Carboxydothermus hydrogenoformans Z-2901	2401520	0		0		0		1		1		0		0		0		0		1		0		I
272562	Clostridia	Clostridium acetobutylicum ATCC 824	4132880	1		1		0		1		1		0		0		0		0		1		0		D+I
290402	Clostridia	Clostridium beijerinckii NCIMB 8052	6000632	1		1		0		1		1		0		0		0		0		1		0		D+I
441770	Clostridia	Clostridium botulinum A str. ATCC 19397	3863450	0		0		0		1		1		0		0		0		0		0		0		I
413999	Clostridia	Clostridium botulinum A str. ATCC 3502	3903260	0		0		0		1		1		0		0		0		0		0		0		I
441771	Clostridia	Clostridium botulinum A str. Hall	3760560	0		0		0		1		1		0		0		0		0		0		0		I
498214	Clostridia	Clostridium botulinum A3 str. Loch Maree	4259691	0		0		0		1		1		0		0		0		0		0		0		I
508765	Clostridia	Clostridium botulinum B str. Eklund 17B	3847969	0		0		0		1		1		0		0		0		0		1		0		I
498213	Clostridia	Clostridium botulinum B1 str. Okra	4107013	0		0		0		1		1		0		0		0		0		0		0		I
508767	Clostridia	Clostridium botulinum E3 str. Alaska E43	3659644	0		0		0		1		1		0		0		0		0		1		0		I
441772	Clostridia	Clostridium botulinum F str. Langeland	4012918	0		0		0		1		1		0		0		0		0		0		0		I
272563	Clostridia	Clostridium difficile 630	4298133	0		0		0		1		1		0		0		0		0		1		0		I
431943	Clostridia	Clostridium kluyveri DSM 555	4023800	0		0		0		1		1		0		0		0		0		1		0		I
386415	Clostridia	Clostridium novyi NT	2547720	0		0		0		1		1		1		0		0		0		1		0		I
195103	Clostridia	Clostridium perfringens ATCC 13124	3256683	0		0		0		1		1		0		0		0		0		1		0		I
289380	Clostridia	Clostridium perfringens SM101	2921996	0		0		0		1		1		0		0		0		0		1		0		I
195102	Clostridia	Clostridium perfringens str. 13	3085740	0		0		0		1		1		0		0		0		0		1		0		I
357809	Clostridia	Clostridium phytofermentans ISDg	4847594	1		1		0		1		1		1		0		0		0		1		0		D+I
212717	Clostridia	Clostridium tetani E88	2873333	0		0		0		1		1		0		0		0		0		1		1		I
203119	Clostridia	Clostridium thermocellum ATCC 27405	3843301	0		0		0		1		1		1		0		1		0		1		0		I
309798	Clostridia	Coprothermobacter proteolyticus DSM 5265	1424912	1		1		0		0		0		0		1		0		0		1		0		D
138119	Clostridia	Desulfitobacterium hafniense Y51	5727534	0		0		0		1		1		0		1		0		0		1		0		I
349161	Clostridia	Desulfotomaculum reducens MI-1	3608104	0		0		0		2		2		0		1		0		0		1		0			I
334413	Clostridia	Finegoldia magna ATCC 29328	1986740	0		0		0		1		1		1		0		0		0		0		0		I
498761	Clostridia	Heliobacterium modesticaldum Ice1	3075407	0		0		0		1		1		0		0		0		0		1		1		I
264732	Clostridia	Moorella thermoacetica ATCC 39073	2628784	0		0		0		1		1		0		1		0		0		1		0		I
457570	Clostridia	Natranaerobius thermophilus JW/NM-WN-LF	3191453	0		0		0		1		1		0		0		0		0		1		0		I
370438	Clostridia	Pelotomaculum thermopropionicum SI	3025375	0		0		0		1		1		1		1		1		0		1		0		I
292459	Clostridia	Symbiobacterium thermophilum IAM 14863	3566135	0		0		0		1		1		0		0		1		0		1		0		I
335541	Clostridia	Syntrophomonas wolfei subsp. wolfei str. Goettingen	2936195	0		0		0		1		1		1		0		0		0		1		0		I
340099	Clostridia	Thermoanaerobacter pseudethanolicus ATCC 33223	2362816	1		1		0		1		1		0		0		0		0		1		0		D+I
399726	Clostridia	Thermoanaerobacter sp. X514	2457259	1		1		0		1		1		0		0		0		0		2		0		D+I
273068	Clostridia	Thermoanaerobacter tengcongensis MB4	2689445	1		1		0		0		0		0		0		0		0		1		0		D
243164	Dehalococcoidetes	Dehalococcoides ethenogenes 195	1469720	0		0		0		0		0		2		0		0		0		0		0			I
216389	Dehalococcoidetes	Dehalococcoides sp. BAV1	1341892	0		0		0		0		0		2		0		0		0		0		0			I
255470	Dehalococcoidetes	Dehalococcoides sp. CBDB1	1395502	0		0		0		0		0		2		0		0		0		0		0			I
319795	Deinococci	Deinococcus geothermalis DSM 11300	3247018	0		0		0		0		0		1		0		0		0		1		2	+		I
243230	Deinococci	Deinococcus radiodurans R1	3284156	0		0		0		0		0		1		0		0		0		1		0			I
262724	Deinococci	Thermus thermophilus HB27	2127482	0		0		0		0		0		1		0		0		0		1		0			I
300852	Deinococci	Thermus thermophilus HB8	2116056	0		0		0		0		0		1		0		0		0		1		0			I
290397	Deltaproteobacteria	Anaeromyxobacter dehalogenans 2CP-C	5013479	0		0		0		1		1		0		0		0		0		1		1		I
404589	Deltaproteobacteria	Anaeromyxobacter sp. Fw109-5	5277990	0		0		0		1		1		0		0		0		1		1		0		I
447217	Deltaproteobacteria	Anaeromyxobacter sp. K	5061632	0		0		0		1		1		0		0		0		0		1		0		I
264462	Deltaproteobacteria	Bdellovibrio bacteriovorus HD100	3782950	1		1		0		0		0		0		0		0		0		0		0		D
96561	Deltaproteobacteria	Desulfococcus oleovorans Hxd3	3944167	0		0		0		1		1		0		0		0		0		0		0		I
177439	Deltaproteobacteria	Desulfotalea psychrophila LSv54	3659634	0		0		0		1		1		1		0		0		0		0		0		I
207559	Deltaproteobacteria	Desulfovibrio desulfuricans subsp. desulfuricans str. G20	3730232	1		1		0		1		1		1		0		0		0		0		1		D+I
391774	Deltaproteobacteria	Desulfovibrio vulgaris DP4	3661391	1		1		0		1		1		0		0		0		0		0		0		D+I
882	Deltaproteobacteria	Desulfovibrio vulgaris str. Hildenborough	3773159	1		1		0		1		1		0		0		0		0		0		0		D+I
404380	Deltaproteobacteria	Geobacter bemidjiensis Bem	4615150	1		1		0		1		1		1		0		0		0		0		0		D+I
398767	Deltaproteobacteria	Geobacter lovleyi SZ	3994874	0		0		0		1		1		1		0		0		0		0		0		I
269799	Deltaproteobacteria	Geobacter metallireducens GS-15	4011182	1		1		0		1		1		1		0		0		0		0		0		D+I
243231	Deltaproteobacteria	Geobacter sulfurreducens PCA	3814139	1		1		0		1		1		1		0		0		0		0		0		D+I
351605	Deltaproteobacteria	Geobacter uraniireducens Rf4	5136364	0		0		0		1		1		1		0		0		0		0		1		I
363253	Deltaproteobacteria	Lawsonia intracellularis PHE/MN1-00	1719014	0		0		0		1		1		0		0		0		0		0		0		I
246197	Deltaproteobacteria	Myxococcus xanthus DK 1622	9139763	1		1		0		1		1		0		1		0		1		0		0		D+I
338963	Deltaproteobacteria	Pelobacter carbinolicus DSM 2380	3665893	0		0		0		1		1		2		0		0		0		1		0		I
338966	Deltaproteobacteria	Pelobacter propionicus DSM 2379	4241119	0		0		0		1		1		1		0		0		0		0		0		I
448385	Deltaproteobacteria	Sorangium cellulosum 'So ce 56'	13033779	0		0		0		2		2		0		0		0		0		0		0			I
335543	Deltaproteobacteria	Syntrophobacter fumaroxidans MPOB	4990251	0		0		0		1		1		1		0		0		0		0		0		I
56780	Deltaproteobacteria	Syntrophus aciditrophicus SB	3179300	0		0		0		1		1		3		0		0		0		0		0		I
309799	Dictyoglomia	Dictyoglomus thermophilum H-6-12	1959987	0		0		0		0		0		1		0		0		0		1		0			I
367737	Epsilonproteobacteria	Arcobacter butzleri RM4018	2341251	0		0		0		1		1		0		0		0		0		0		0		I
360104	Epsilonproteobacteria	Campylobacter concisus 13826	2099413	0		0		0		1		1		0		0		0		0		0		0		I
360105	Epsilonproteobacteria	Campylobacter curvus 525.92	1971264	0		0		0		1		1		0		0		0		0		0		0		I
360106	Epsilonproteobacteria	Campylobacter fetus subsp. fetus 82-40	1773615	0		0		0		1		1		0		0		0		0		0		0		I
360107	Epsilonproteobacteria	Campylobacter hominis ATCC BAA-381	1714951	0		0		0		1		1		0		0		0		0		0		0		I
195099	Epsilonproteobacteria	Campylobacter jejuni RM1221	1777831	0		0		0		1		1		0		0		0		0		0		0		I
360109	Epsilonproteobacteria	Campylobacter jejuni subsp. doylei 269.97	1845106	0		0		0		1		1		0		0		0		0		0		0		I
354242	Epsilonproteobacteria	Campylobacter jejuni subsp. jejuni 81-176	1699052	0		0		0		1		1		0		0		0		0		0		0		I
407148	Epsilonproteobacteria	Campylobacter jejuni subsp. jejuni 81116	1628115	0		0		0		1		1		0		0		0		0		0		0		I
192222	Epsilonproteobacteria	Campylobacter jejuni subsp. jejuni NCTC 11168	1641481	0		0		0		1		1		0		0		0		0		0		0		I
382638	Epsilonproteobacteria	Helicobacter acinonychis str. Sheeba	1557588	0		0		0		1		1		0		0		0		0		1		0		I
235279	Epsilonproteobacteria	Helicobacter hepaticus ATCC 51449	1799146	0		0		0		1		1		0		0		0		0		0		0		I
85962	Epsilonproteobacteria	Helicobacter pylori 26695	1667867	0		0		0		1		1		0		0		0		0		1		0		I
563041	Epsilonproteobacteria	Helicobacter pylori G27	1663013	0		0		0		1		1		0		0		0		0		1		0		I
357544	Epsilonproteobacteria	Helicobacter pylori HPAG1	1605736	0		0		0		1		1		0		0		0		0		1		0		I
85963	Epsilonproteobacteria	Helicobacter pylori J99	1643831	0		0		0		1		1		0		0		0		0		1		0		I
512562	Epsilonproteobacteria	Helicobacter pylori Shi470	1608548	0		0		0		1		1		0		0		0		0		1		0		I
387092	Epsilonproteobacteria	Nitratiruptor sp. SB155-2	1877931	1		1		0		0		0		0		0		0		0		0		0		D
326298	Epsilonproteobacteria	Sulfurimonas denitrificans DSM 1251	2201561	0		0		0		1		1		0		0		0		0		0		0		I
387093	Epsilonproteobacteria	Sulfurovum sp. NBC37-1	2562277	1		1		0		1		1		0		0		0		0		0		0		D+I
273121	Epsilonproteobacteria	Wolinella succinogenes DSM 1740	2110355	0		0		0		1		1		0		0		0		0		0		0		I
444179	Flavobacteria	Candidatus Sulcia muelleri GWSS	245530	0		0		0		0		0		0		0		0		0		0		0			None
376686	Flavobacteria	Flavobacterium johnsoniae UW101	6096872	0		0		0		1		1		0		0		0		0		0		0		I
402612	Flavobacteria	Flavobacterium psychrophilum JIP02/86	2861988	0		0		0		1		1		0		0		0		0		0		0		I
411154	Flavobacteria	Gramella forsetii KT0803	3798465	0		0		0		1		1		0		0		0		0		0		0		I
190304	Fusobacteria	Fusobacterium nucleatum subsp. nucleatum ATCC 25586	2174500	1		1		0		0		0		0		0		0		0		0		0		D
380394	Gammaproteobacteria	Acidithiobacillus ferrooxidans ATCC 53993	2885038	0		0		0		2		2		0		0		0		0		0		0			D
405416	Gammaproteobacteria	Acinetobacter baumannii ACICU	3996761	0		0		0		1		1		0		0		0		0		0		0		I
400667	Gammaproteobacteria	Acinetobacter baumannii ATCC 17978	4001457	0		0		0		1		1		0		0		0		0		0		0		I
509173	Gammaproteobacteria	Acinetobacter baumannii AYE	4048735	0		0		0		1		1		0		0		0		0		0		0		I
509170	Gammaproteobacteria	Acinetobacter baumannii SDF	3477996	0		0		0		1		1		0		0		0		0		0		0		I
62977	Gammaproteobacteria	Acinetobacter sp. ADP1	3598621	0		0		0		1		1		0		0		0		0		0		0		I
416269	Gammaproteobacteria	Actinobacillus pleuropneumoniae L20	2274482	1		1		0		0		0		0		0		0		0		0		0		D
434271	Gammaproteobacteria	Actinobacillus pleuropneumoniae serovar 3 str. JL03	2242062	1		1		0		0		0		0		0		0		0		0		0		D
537457	Gammaproteobacteria	Actinobacillus pleuropneumoniae serovar 7 str. AP76	2345435	1		1		0		0		0		0		0		0		0		0		0		D
339671	Gammaproteobacteria	Actinobacillus succinogenes 130Z	2319663	1		1		0		0		0		0		0		0		0		1		0		D
380703	Gammaproteobacteria	Aeromonas hydrophila subsp. hydrophila ATCC 7966	4744448	0		0		0		1		1		0		0		0		0		1		2		I
382245	Gammaproteobacteria	Aeromonas salmonicida subsp. salmonicida A449	5040536	0		0		0		1		1		0		0		0		0		1		2		I
393595	Gammaproteobacteria	Alcanivorax borkumensis SK2	3120143	1		1		0		0		0		0		0		0		0		0		0		D
187272	Gammaproteobacteria	Alkalilimnicola ehrlichei MLHE-1	3275944	1		1		0		0		0		0		0		0		0		0		0		D
314275	Gammaproteobacteria	Alteromonas macleodii 'Deep ecotype'	4412282	1		1		0		0		0		0		0		0		0		0		1		D
374463	Gammaproteobacteria	Baumannia cicadellinicola str. Hc (Homalodisca coagulata)	686194	1		1		0		0		0		0		0		0		0		0		0		D
107806	Gammaproteobacteria	Buchnera aphidicola str. APS (Acyrthosiphon pisum)	655725	1		1		0		0		0		0		0		0		0		1		0		D
224915	Gammaproteobacteria	Buchnera aphidicola str. Bp (Baizongia pistaciae)	618379	1		1		0		0		0		0		0		0		0		1		0		D
372461	Gammaproteobacteria	Buchnera aphidicola str. Cc (Cinara cedri)	416380	1		1		0		0		0		0		0		0		0		0		0		D
198804	Gammaproteobacteria	Buchnera aphidicola str. Sg (Schizaphis graminum)	641454	1		1		0		0		0		0		0		0		0		1		0		D
203907	Gammaproteobacteria	Candidatus Blochmannia floridanus	705557	1		1		0		0		0		0		0		0		0		0		0		D
291272	Gammaproteobacteria	Candidatus Blochmannia pennsylvanicus str. BPEN	791654	1		1		0		0		0		0		0		0		0		0		0		D
387662	Gammaproteobacteria	Candidatus Carsonella ruddii PV	159662	0		0		0		0		0		0		0		0		0		0		0			None
413404	Gammaproteobacteria	Candidatus Ruthia magnifica str. Cm (Calyptogena magnifica)	1160782	0		0		0		1		1		0		0		0		0		0		0		I
412965	Gammaproteobacteria	Candidatus Vesicomyosocius okutanii HA	1022154	0		0		0		1		1		0		0		0		0		0		0		I
498211	Gammaproteobacteria	Cellvibrio japonicus Ueda107	4576573	0		0		0		1		1		0		0		0		0		0		1		I
290398	Gammaproteobacteria	Chromohalobacter salexigens DSM 3043	3696649	0		0		0		1		1		0		0		0		0		1		0		I
290338	Gammaproteobacteria	Citrobacter koseri ATCC BAA-895	4735357	1		1		0		1		1		0		1		0		0		2		1		D+I
167879	Gammaproteobacteria	Colwellia psychrerythraea 34H	5373180	0		0		0		1		1		0		0		0		0		1		3		I
434922	Gammaproteobacteria	Coxiella burnetii Dugway 5J108-111	2212937	0		0		0		1		1		0		0		0		0		0		0		I
360115	Gammaproteobacteria	Coxiella burnetii RSA 331	2053744	0		0		0		1		1		0		0		0		0		0		0		I
227377	Gammaproteobacteria	Coxiella burnetii RSA 493	2032674	0		0		0		1		1		0		0		0		0		0		0		I
246195	Gammaproteobacteria	Dichelobacter nodosus VCS1703A	1389350	1		1		0		0		0		0		0		0		0		0		0		D
290339	Gammaproteobacteria	Enterobacter sakazakii ATCC BAA-894	4530777	1		1		0		1		1		0		1		0		0		1		0		D+I
399742	Gammaproteobacteria	Enterobacter sp. 638	4676461	1		1		0		1		1		0		1		0		0		1		1		D+I
465817	Gammaproteobacteria	Erwinia tasmaniensis Et1/99	4067864	1		1		0		0		0		0		1		0		0		1		1		D
362663	Gammaproteobacteria	Escherichia coli 536	4938920	1		1		0		1		1		0		1		0		0		2		1		D+I
405955	Gammaproteobacteria	Escherichia coli APEC O1	5497653	1		1		0		1		1		0		1		0		0		2		1		D+I
481805	Gammaproteobacteria	Escherichia coli ATCC 8739	4746218	1		1		0		1		1		0		1		0		0		2		1		D+I
199310	Gammaproteobacteria	Escherichia coli CFT073	5231428	1		1		0		1		1		0		1		0		0		2		1		D+I
331111	Gammaproteobacteria	Escherichia coli E24377A	5249288	1		1		0		1		1		0		1		0		0		2		1		D+I
331112	Gammaproteobacteria	Escherichia coli HS	4643538	1		1		0		1		1		0		1		0		0		2		1		D+I
155864	Gammaproteobacteria	Escherichia coli O157:H7 EDL933	5620522	1		1		0		1		1		0		1		0		0		1		1		D+I
444450	Gammaproteobacteria	Escherichia coli O157:H7 str. EC4115	5704171	1		1		0		1		1		0		1		0		0		1		1		D+I
386585	Gammaproteobacteria	Escherichia coli O157:H7 str. Sakai	5594477	1		1		0		1		1		0		1		0		0		1		1		D+I
439855	Gammaproteobacteria	Escherichia coli SMS-3-5	5215377	1		1		0		1		1		0		1		0		0		2		1		D+I
364106	Gammaproteobacteria	Escherichia coli UTI89	5179971	1		1		0		1		1		0		1		0		0		2		1		D+I
316385	Gammaproteobacteria	Escherichia coli str. K-12 substr. DH10B	4686137	1		1		0		1		1		0		1		0		0		2		1		D+I
511145	Gammaproteobacteria	Escherichia coli str. K-12 substr. MG1655	4639675	1		1		0		1		1		0		1		0		0		2		1		D+I
316407	Gammaproteobacteria	Escherichia coli str. K-12 substr. W3110	4646332	1		1		0		1		1		0		1		0		0		2		1		D+I
401614	Gammaproteobacteria	Francisella novicida U112	1910031	0		0		0		1		1		0		0		0		0		1		0		I
484022	Gammaproteobacteria	Francisella philomiragia subsp. philomiragia ATCC 25017	2049711	0		0		0		1		1		0		0		0		0		1		0		I
119857	Gammaproteobacteria	Francisella tularensis subsp. holarctica	1895994	0		0		0		1		1		0		0		0		0		1		0		I
458234	Gammaproteobacteria	Francisella tularensis subsp. holarctica FTNF002-00	1890909	0		0		0		1		1		0		0		0		0		1		0		I
393011	Gammaproteobacteria	Francisella tularensis subsp. holarctica OSU18	1895727	0		0		0		1		1		0		0		0		0		1		0		I
441952	Gammaproteobacteria	Francisella tularensis subsp. mediasiatica FSC147	1893886	0		0		0		1		1		0		0		0		0		1		0		I
393115	Gammaproteobacteria	Francisella tularensis subsp. tularensis FSC198	1892616	0		0		0		1		1		0		0		0		0		1		0		I
177416	Gammaproteobacteria	Francisella tularensis subsp. tularensis SCHU S4	1892819	0		0		0		1		1		0		0		0		0		1		0		I
418136	Gammaproteobacteria	Francisella tularensis subsp. tularensis WY96-3418	1898476	0		0		0		1		1		0		0		0		0		1		0		I
233412	Gammaproteobacteria	Haemophilus ducreyi 35000HP	1698955	1		1		0		0		0		0		0		0		0		0		0		D
281310	Gammaproteobacteria	Haemophilus influenzae 86-028NP	1914490	1		1		0		0		0		0		0		0		0		0		0		D
374930	Gammaproteobacteria	Haemophilus influenzae PittEE	1813033	1		1		0		0		0		0		0		0		0		0		0		D
374931	Gammaproteobacteria	Haemophilus influenzae PittGG	1887192	1		1		0		0		0		0		0		0		0		0		0		D
71421	Gammaproteobacteria	Haemophilus influenzae Rd KW20	1830138	1		1		0		0		0		0		0		0		0		0		0		D
205914	Gammaproteobacteria	Haemophilus somnus 129PT	2012878	1		1		0		0		0		0		0		0		0		0		0		D
228400	Gammaproteobacteria	Haemophilus somnus 2336	2263857	1		1		0		0		0		0		0		0		0		0		0		D
349521	Gammaproteobacteria	Hahella chejuensis KCTC 2396	7215267	0		0		0		1		1		0		0		0		0		1		1		I
349124	Gammaproteobacteria	Halorhodospira halophila SL1	2678452	1		1		0		0		0		0		0		0		0		0		0		D
283942	Gammaproteobacteria	Idiomarina loihiensis L2TR	2839318	0		0		0		1		1		0		0		0		0		1		1		I
507522	Gammaproteobacteria	Klebsiella pneumoniae 342	5920257	1		1		0		1		1		0		1		1		0		1		1		D+I
272620	Gammaproteobacteria	Klebsiella pneumoniae subsp. pneumoniae MGH 78578	5694894	1		1		0		1		1		0		1		1		0		1		1		D+I
400673	Gammaproteobacteria	Legionella pneumophila str. Corby	3576470	0		0		0		1		1		0		0		0		0		1		0		I
297245	Gammaproteobacteria	Legionella pneumophila str. Lens	3405519	0		0		0		1		1		0		0		0		0		1		0		I
297246	Gammaproteobacteria	Legionella pneumophila str. Paris	3635495	0		0		0		1		1		0		0		0		0		1		0		I
272624	Gammaproteobacteria	Legionella pneumophila subsp. pneumophila str. Philadelphia 1	3397754	0		0		0		1		1		0		0		0		0		1		0		I
221988	Gammaproteobacteria	Mannheimia succiniciproducens MBEL55E	2314078	1		1		0		0		0		0		0		0		0		0		0		D
351348	Gammaproteobacteria	Marinobacter aquaeolei VT8	4779762	0		0		0		1		1		0		0		0		0		0		0		I
400668	Gammaproteobacteria	Marinomonas sp. MWYL1	5100344	0		0		0		1		1		0		0		0		0		0		0		I
243233	Gammaproteobacteria	Methylococcus capsulatus str. Bath	3304561	0		0		0		1		1		0		0		0		0		0		1		I
323261	Gammaproteobacteria	Nitrosococcus oceani ATCC 19707	3522111	1		1		0		1		1		0		0		0		0		0		0		D+I
272843	Gammaproteobacteria	Pasteurella multocida subsp. multocida str. Pm70	2257487	1		1		0		0		0		0		0		0		0		0		0		D
218491	Gammaproteobacteria	Pectobacterium atrosepticum SCRI1043	5064019	1		1		0		0		0		0		1		0		0		1		1		D
298386	Gammaproteobacteria	Photobacterium profundum SS9	6403280	0		0		0		1		1		0		0		0		0		1		0		I
243265	Gammaproteobacteria	Photorhabdus luminescens subsp. laumondii TTO1	5688987	1		1		0		0		0		0		1		0		0		1		1		D
529507	Gammaproteobacteria	Proteus mirabilis HI4320	4099895	1		1		0		0		0		0		1		0		0		1		1		D
342610	Gammaproteobacteria	Pseudoalteromonas atlantica T6c	5187005	1		1		0		1		1		0		0		0		0		0		1		D+I
326442	Gammaproteobacteria	Pseudoalteromonas haloplanktis TAC125	3850272	0		0		0		1		1		0		0		0		0		1		3	+	I
381754	Gammaproteobacteria	Pseudomonas aeruginosa PA7	6588339	0		0		0		1		1		0		0		0		0		0		1		I
208964	Gammaproteobacteria	Pseudomonas aeruginosa PAO1	6264404	0		0		0		1		1		0		0		0		0		0		1		I
208963	Gammaproteobacteria	Pseudomonas aeruginosa UCBPP-PA14	6537648	0		0		0		1		1		0		0		0		0		0		1		I
384676	Gammaproteobacteria	Pseudomonas entomophila L48	5888780	0		0		0		1		1		0		0		0		0		0		0		I
220664	Gammaproteobacteria	Pseudomonas fluorescens Pf-5	7074893	0		0		0		1		1		0		0		0		0		0		0		I
205922	Gammaproteobacteria	Pseudomonas fluorescens Pf0-1	6438405	0		0		0		1		1		0		0		0		0		0		0		I
399739	Gammaproteobacteria	Pseudomonas mendocina ymp	5072807	0		0		0		1		1		0		0		0		0		0		0		I
351746	Gammaproteobacteria	Pseudomonas putida F1	5959964	0		0		0		2		2		0		0		0		0		0		0			I
76869	Gammaproteobacteria	Pseudomonas putida GB-1	6078430	0		0		0		1		1		0		0		0		0		0		0		I
160488	Gammaproteobacteria	Pseudomonas putida KT2440	6181863	0		0		0		1		1		0		0		0		0		0		0		I
390235	Gammaproteobacteria	Pseudomonas putida W619	5774330	0		0		0		1		1		0		0		0		0		0		0		I
379731	Gammaproteobacteria	Pseudomonas stutzeri A1501	4567418	0		0		0		1		1		0		0		0		0		0		0		I
264730	Gammaproteobacteria	Pseudomonas syringae pv. phaseolicola 1448A	6112448	0		0		0		1		1		0		0		0		0		0		0		I
205918	Gammaproteobacteria	Pseudomonas syringae pv. syringae B728a	6093698	0		0		0		1		1		0		0		0		0		0		0		I
223283	Gammaproteobacteria	Pseudomonas syringae pv. tomato str. DC3000	6538260	0		0		0		1		1		0		0		0		0		0		0		I
259536	Gammaproteobacteria	Psychrobacter arcticus 273-4	2650701	0		0		0		1		1		0		0		0		0		0		0		I
335284	Gammaproteobacteria	Psychrobacter cryohalolentis K5	3101097	0		0		0		1		1		0		0		0		0		0		0		I
349106	Gammaproteobacteria	Psychrobacter sp. PRwf-1	2995049	0		0		0		1		1		0		0		0		0		0		0		I
357804	Gammaproteobacteria	Psychromonas ingrahamii 37	4559598	0		0		0		1		1		0		0		0		0		1		2		I
203122	Gammaproteobacteria	Saccharophagus degradans 2-40	5057531	1		1		0		1		1		0		0		0		0		0		1		D+I
41514	Gammaproteobacteria	Salmonella enterica subsp. arizonae serovar 62:z4,z23:--	4600800	1		1		0		1		1		0		1		0		0		1		0		D+I
454166	Gammaproteobacteria	Salmonella enterica subsp. enterica serovar Agona str. SL483	4836638	1		1		0		1		1		0		1		1		0		1		0		D+I
321314	Gammaproteobacteria	Salmonella enterica subsp. enterica serovar Choleraesuis str. SC-B67	4944000	1		1		0		1		1		0		1		1		0		1		0		D+I
439851	Gammaproteobacteria	Salmonella enterica subsp. enterica serovar Dublin str. CT_02021853	4917459	1		1		0		1		1		0		1		1		0		1		0		D+I
550537	Gammaproteobacteria	Salmonella enterica subsp. enterica serovar Enteritidis str. P125109	4685848	1		1		0		1		1		0		1		1		0		1		0		D+I
550538	Gammaproteobacteria	Salmonella enterica subsp. enterica serovar Gallinarum str. 287/91	4658697	1		1		0		1		1		0		1		1		0		1		0		D+I
454169	Gammaproteobacteria	Salmonella enterica subsp. enterica serovar Heidelberg str. SL476	4983515	1		1		0		1		1		0		1		1		0		1		0		D+I
423368	Gammaproteobacteria	Salmonella enterica subsp. enterica serovar Newport str. SL254	5007719	1		1		0		1		1		0		1		1		0		1		0		D+I
554290	Gammaproteobacteria	Salmonella enterica subsp. enterica serovar Paratyphi A str. AKU_12601	4581797	1		1		0		1		1		0		1		0		0		1		0		D+I
295319	Gammaproteobacteria	Salmonella enterica subsp. enterica serovar Paratyphi A str. ATCC 9150	4585229	1		1		0		1		1		0		1		1		0		1		0		D+I
272994	Gammaproteobacteria	Salmonella enterica subsp. enterica serovar Paratyphi B str. SPB7	4858887	1		1		0		1		1		0		1		1		0		1		0		D+I
439843	Gammaproteobacteria	Salmonella enterica subsp. enterica serovar Schwarzengrund str. CVM19633	4823887	1		1		0		1		1		0		1		1		0		1		0		D+I
220341	Gammaproteobacteria	Salmonella enterica subsp. enterica serovar Typhi str. CT18	5133713	1		1		0		1		1		0		1		1		0		1		0		D+I
209261	Gammaproteobacteria	Salmonella enterica subsp. enterica serovar Typhi str. Ty2	4791961	1		1		0		1		1		0		1		1		0		1		0		D+I
99287	Gammaproteobacteria	Salmonella enterica subsp. enterica serovar Typhimurium str. LT2	4951371	1		1		0		1		1		0		1		1		0		1		0		D+I
399741	Gammaproteobacteria	Serratia proteamaculans 568	5495657	1		1		0		1		1		0		1		0		0		2		1		D+I
326297	Gammaproteobacteria	Shewanella amazonensis SB2B	4306142	0		0		0		1		1		0		0		0		0		1		2		I
325240	Gammaproteobacteria	Shewanella baltica OS155	5342896	0		0		0		1		1		0		0		0		0		1		3		I
402882	Gammaproteobacteria	Shewanella baltica OS185	5312910	0		0		0		1		1		0		0		0		0		1		3		I
399599	Gammaproteobacteria	Shewanella baltica OS195	5547544	0		0		0		1		1		0		0		0		0		1		3		I
318161	Gammaproteobacteria	Shewanella denitrificans OS217	4545906	0		0		0		1		1		0		0		0		0		1		2		I
318167	Gammaproteobacteria	Shewanella frigidimarina NCIMB 400	4845257	0		0		0		1		1		0		0		0		0		1		2		I
458817	Gammaproteobacteria	Shewanella halifaxensis HAW-EB4	5226917	0		0		0		1		1		0		0		0		0		1		2		I
323850	Gammaproteobacteria	Shewanella loihica PV-4	4602594	0		0		0		1		1		0		0		0		0		1		3		I
211586	Gammaproteobacteria	Shewanella oneidensis MR-1	5131416	0		0		0		1		1		0		0		0		0		1		1		I
398579	Gammaproteobacteria	Shewanella pealeana ATCC 700345	5174581	0		0		0		1		1		0		0		0		0		1		3		I
319224	Gammaproteobacteria	Shewanella putrefaciens CN-32	4659220	0		0		0		1		1		0		0		0		0		1		1		I
425104	Gammaproteobacteria	Shewanella sediminis HAW-EB3	5517674	0		0		0		1		1		0		0		0		0		1		4		I
94122	Gammaproteobacteria	Shewanella sp. ANA-3	5251146	0		0		0		1		1		0		0		0		0		1		3		I
60480	Gammaproteobacteria	Shewanella sp. MR-4	4706287	0		0		0		1		1		0		0		0		0		1		3		I
60481	Gammaproteobacteria	Shewanella sp. MR-7	4799109	0		0		0		1		1		0		0		0		0		1		3		I
351745	Gammaproteobacteria	Shewanella sp. W3-18-1	4708380	0		0		0		1		1		0		0		0		0		1		1		I
392500	Gammaproteobacteria	Shewanella woodyi ATCC 51908	5935403	0		0		0		1		1		0		0		0		0		1		4		I
344609	Gammaproteobacteria	Shigella boydii CDC 3083-94	4874659	1		1		0		1		1		0		1		0		0		2		1		D+I
300268	Gammaproteobacteria	Shigella boydii Sb227	4646520	1		1		0		1		1		0		1		0		0		2		1		D+I
300267	Gammaproteobacteria	Shigella dysenteriae Sd197	4560911	1		1		0		1		1		0		1		0		0		2		1		D+I
198215	Gammaproteobacteria	Shigella flexneri 2a str. 2457T	4599354	1		1		0		1		1		0		1		0		0		2		1		D+I
198214	Gammaproteobacteria	Shigella flexneri 2a str. 301	4828821	1		1		0		1		1		0		1		0		0		2		1		D+I
373384	Gammaproteobacteria	Shigella flexneri 5 str. 8401	4574284	1		1		0		1		1		0		1		0		0		2		1		D+I
300269	Gammaproteobacteria	Shigella sonnei Ss046	5055316	1		1		0		1		1		0		1		0		0		2		1		D+I
343509	Gammaproteobacteria	Sodalis glossinidius str. 'morsitans'	4292502	1		1		0		0		0		0		1		0		0		1		1		D
522373	Gammaproteobacteria	Stenotrophomonas maltophilia K279a	4851126	1		1		0		0		0		0		0		0		0		0		1		D
391008	Gammaproteobacteria	Stenotrophomonas maltophilia R551-3	4573969	1		1		0		0		0		0		0		0		0		0		1		D
317025	Gammaproteobacteria	Thiomicrospira crunogena XCL-2	2427734	0		0		0		1		1		0		0		0		0		0		0		I
243277	Gammaproteobacteria	Vibrio cholerae O1 biovar El Tor str. N16961	4033464	0		0		0		1		1		0		0		0		0		1		0		I
345073	Gammaproteobacteria	Vibrio cholerae O395	4132319	0		0		0		1		1		0		0		0		0		1		0		I
312309	Gammaproteobacteria	Vibrio fischeri ES114	4273718	0		0		0		1		1		0		0		0		0		1		0		i
388396	Gammaproteobacteria	Vibrio fischeri MJ11	4503336	0		0		0		1		1		0		0		0		0		1		0		I
338187	Gammaproteobacteria	Vibrio harveyi ATCC BAA-1116	6058377	0		0		0		1		1		0		0		0		0		1		2	+	I
223926	Gammaproteobacteria	Vibrio parahaemolyticus RIMD 2210633	5165770	0		0		0		1		1		0		0		0		0		1		2	+	I
216895	Gammaproteobacteria	Vibrio vulnificus CMCP6	5126797	0		0		0		1		1		0		0		0		0		1		0		I
196600	Gammaproteobacteria	Vibrio vulnificus YJ016	5260086	0		0		0		1		1		0		0		0		0		1		1		I
36870	Gammaproteobacteria	Wigglesworthia glossinidia endosymbiont of Glossina brevipalpis	703004	1		1		0		0		0		0		0		0		0		0		0		D
190486	Gammaproteobacteria	Xanthomonas axonopodis pv. citri str. 306	5274174	1		1		0		0		0		0		0		0		0		0		0		D
314565	Gammaproteobacteria	Xanthomonas campestris pv. campestris str. 8004	5148708	1		1		0		0		0		0		0		0		0		0		0		D
190485	Gammaproteobacteria	Xanthomonas campestris pv. campestris str. ATCC 33913	5076188	1		1		0		0		0		0		0		0		0		0		0		D
509169	Gammaproteobacteria	Xanthomonas campestris pv. campestris str. B100	5079002	1		1		0		0		0		0		0		0		0		0		0		D
316273	Gammaproteobacteria	Xanthomonas campestris pv. vesicatoria str. 85-10	5420152	1		1		0		0		0		0		0		0		0		0		0		D
291331	Gammaproteobacteria	Xanthomonas oryzae pv. oryzae KACC10331	4941439	1		1		0		0		0		0		0		0		0		0		0		D
342109	Gammaproteobacteria	Xanthomonas oryzae pv. oryzae MAFF 311018	4940217	1		1		0		0		0		0		0		0		0		0		0		D
360094	Gammaproteobacteria	Xanthomonas oryzae pv. oryzae PXO99A	5240075	1		1		0		0		0		0		0		0		0		0		0		D
160492	Gammaproteobacteria	Xylella fastidiosa 9a5c	2731750	1		1		0		0		0		0		0		0		0		0		0		D
405440	Gammaproteobacteria	Xylella fastidiosa M12	2475130	1		1		0		0		0		0		0		0		0		0		0		D
405441	Gammaproteobacteria	Xylella fastidiosa M23	2573987	1		1		0		0		0		0		0		0		0		0		0		D
183190	Gammaproteobacteria	Xylella fastidiosa Temecula1	2521148	1		1		0		0		0		0		0		0		0		0		0		D
393305	Gammaproteobacteria	Yersinia enterocolitica subsp. enterocolitica 8081	4683620	1		1		0		1		1		0		1		0		0		2		1		D+I
349746	Gammaproteobacteria	Yersinia pestis Angola	4687014	1		1		0		1		1		0		1		0		0		1		1		D+I
360102	Gammaproteobacteria	Yersinia pestis Antiqua	4879836	1		1		0		1		1		0		1		0		0		1		1		D+I
214092	Gammaproteobacteria	Yersinia pestis CO92	4829855	1		1		0		1		1		0		1		0		0		1		1		D+I
187410	Gammaproteobacteria	Yersinia pestis KIM	4701745	1		1		0		1		1		0		1		0		0		1		1		D+I
377628	Gammaproteobacteria	Yersinia pestis Nepal516	4646286	1		1		0		1		1		0		1		0		0		1		1		D+I
386656	Gammaproteobacteria	Yersinia pestis Pestoides F	4725862	1		1		0		1		1		0		1		0		0		1		1		D+I
229193	Gammaproteobacteria	Yersinia pestis biovar Microtus str. 91001	4803217	1		1		0		1		1		0		1		0		0		1		1		D+I
349747	Gammaproteobacteria	Yersinia pseudotuberculosis IP 31758	4935125	1		1		0		1		1		0		1		0		0		1		1		D+I
273123	Gammaproteobacteria	Yersinia pseudotuberculosis IP 32953	4840898	1		1		0		1		1		0		1		0		0		1		1		D+I
502801	Gammaproteobacteria	Yersinia pseudotuberculosis PB1/+	4765431	1		1		0		1		1		0		1		0		0		1		1		D+I
502800	Gammaproteobacteria	Yersinia pseudotuberculosis YPIII	4689441	1		1		0		1		1		0		1		0		0		1		1		D+I
251221	Gloeobacteria	Gloeobacter violaceus PCC 7421	4659019	2		2		0		1		1		0		0		0		0		0		0			D
441768	Mollicutes	Acholeplasma laidlawii PG-8A	1496992	0		0		0		1		1		0		0		0		0		1		0		I
322098	Mollicutes	Aster yellows witches'-broom phytoplasma AYWB	723970	0		0		0		1		1		0		0		0		0		0		0		I
59748	Mollicutes	Candidatus Phytoplasma australiense	879959	0		0		0		1		1		0		0		0		0		0		0		I
37692	Mollicutes	Candidatus Phytoplasma mali	601943	0		0		0		0		0		0		0		0		0		0		0			none
265311	Mollicutes	Mesoplasma florum L1	793224	0		0		0		1		1		0		0		0		0		0		0		I
347257	Mollicutes	Mycoplasma agalactiae PG2	877438	0		0		0		1		1		0		0		0		0		1		0		I
243272	Mollicutes	Mycoplasma arthritidis 158L3-1	820453	0		0		0		1		1		0		0		0		0		1		0		I
340047	Mollicutes	Mycoplasma capricolum subsp. capricolum ATCC 27343	1010023	0		0		0		1		1		0		0		0		0		0		0		I
233150	Mollicutes	Mycoplasma gallisepticum R	996422	0		0		0		1		1		0		0		0		0		0		0		I
243273	Mollicutes	Mycoplasma genitalium G37	580076	0		0		0		1		1		0		0		0		0		0		0		I
295358	Mollicutes	Mycoplasma hyopneumoniae 232	892758	0		0		0		1		1		0		0		0		0		1		0		I
262722	Mollicutes	Mycoplasma hyopneumoniae 7448	920079	0		0		0		1		1		0		0		0		0		1		0		I
262719	Mollicutes	Mycoplasma hyopneumoniae J	897405	0		0		0		1		1		0		0		0		0		1		0		I
267748	Mollicutes	Mycoplasma mobile 163K	777079	0		0		0		1		1		0		0		0		0		1		0		I
272632	Mollicutes	Mycoplasma mycoides subsp. mycoides SC str. PG1	1211703	0		0		0		1		1		0		0		0		0		0		0		I
272633	Mollicutes	Mycoplasma penetrans HF-2	1358633	0		0		0		1		1		0		0		0		0		0		0		I
272634	Mollicutes	Mycoplasma pneumoniae M129	816394	0		0		0		1		1		0		0		0		0		0		0		I
272635	Mollicutes	Mycoplasma pulmonis UAB CTIP	963879	0		0		0		1		1		0		0		0		0		1		0		I
262723	Mollicutes	Mycoplasma synoviae 53	799476	0		0		0		1		1		0		0		0		0		1		0		I
262768	Mollicutes	Onion yellows phytoplasma OY-M	860631	0		0		0		1		1		0		0		0		0		0		0		I
505682	Mollicutes	Ureaplasma parvum serovar 3 str. ATCC 27815	751679	0		0		0		1		1		0		0		0		0		0		0		I
273119	Mollicutes	Ureaplasma parvum serovar 3 str. ATCC 700970	751719	0		0		0		1		1		0		0		0		0		0		0		I
289376	Nitrospira	Thermodesulfovibrio yellowstonii DSM 11347	2003803	0		0		0		0		0		2		0		0		0		0		1			I
240292	Nostocales	Anabaena variabilis ATCC 29413	7068601	0		0		0		1		1		0		0		0		0		0		0		I
63737	Nostocales	Nostoc punctiforme PCC 73102	9059191	0		0		0		1		1		0		0		0		0		0		0		I
103690	Nostocales	Nostoc sp. PCC 7120	7211789	0		0		0		1		1		0		0		0		0		0		0		I
452637	Opitutae	Opitutus terrae PB90-1	5957605	0		0		0		1		1		0		0		0		0		0		0		I
203124	Oscillatoriales	Trichodesmium erythraeum IMS101	7750108	0		0		0		1		1		0		0		0		0		0		0		I
243090	Planctomycetacia	Rhodopirellula baltica SH 1	7145576	0		0		0		1		1		1		0		0		1		0		0		I
146891	Prochlorales	Prochlorococcus marinus str. AS9601	1669886	0		0		0		1		1		0		0		0		0		0		0		I
93059	Prochlorales	Prochlorococcus marinus str. MIT 9211	1688963	0		0		0		1		1		0		0		0		0		0		0		I
93060	Prochlorales	Prochlorococcus marinus str. MIT 9215	1738790	0		0		0		1		1		0		0		0		0		0		0		I
167546	Prochlorales	Prochlorococcus marinus str. MIT 9301	1641879	0		0		0		1		1		0		0		0		0		0		0		I
59922	Prochlorales	Prochlorococcus marinus str. MIT 9303	2682675	0		0		0		1		1		0		0		0		1		0		0		I
74546	Prochlorales	Prochlorococcus marinus str. MIT 9312	1709204	0		0		0		1		1		0		0		0		0		0		0		I
74547	Prochlorales	Prochlorococcus marinus str. MIT 9313	2410873	0		0		0		1		1		0		0		0		1		0		0		I
167542	Prochlorales	Prochlorococcus marinus str. MIT 9515	1704176	0		0		0		1		1		0		0		0		0		0		0		I
167555	Prochlorales	Prochlorococcus marinus str. NATL1A	1864731	0		0		0		1		1		0		0		0		0		0		0		I
59920	Prochlorales	Prochlorococcus marinus str. NATL2A	1842899	0		0		0		1		1		0		0		0		0		0		0		I
167539	Prochlorales	Prochlorococcus marinus subsp. marinus str. CCMP1375	1751080	0		0		0		1		1		0		0		0		0		0		0		I
59919	Prochlorales	Prochlorococcus marinus subsp. pastoris str. CCMP1986	1657990	0		0		0		1		1		0		0		0		0		0		0		I
234267	Solibacteres	Solibacter usitatus Ellin6076	9965640	1		1		0		0		0		0		0		0		1		1		0		D
269798	Sphingobacteria	Cytophaga hutchinsonii ATCC 33406	4433218	1		1		0		1		1		0		0		0		0		0		0		D+I
309807	Sphingobacteria	Salinibacter ruber DSM 13855	3587328	0		0		0		1		1		0		0		0		0		0		2		I
390236	Spirochaetes	Borrelia afzelii PKo	1201674	1		1		0		0		0		0		0		0		0		0		0		D
224326	Spirochaetes	Borrelia burgdorferi B31	1519856	1		1		0		0		0		0		0		0		0		0		0		D
412419	Spirochaetes	Borrelia duttonii Ly	1574881	1		1		0		0		0		0		0		0		0		0		0		D
290434	Spirochaetes	Borrelia garinii PBi	986914	1		1		0		0		0		0		0		0		0		0		0		D
314723	Spirochaetes	Borrelia hermsii DAH	922307	1		1		0		0		0		0		0		0		0		0		0		D
412418	Spirochaetes	Borrelia recurrentis A1	1242163	1		1		0		0		0		0		0		0		0		0		0		D
314724	Spirochaetes	Borrelia turicatae 91E135	917330	1		1		0		0		0		0		0		0		0		0		0		D
355278	Spirochaetes	Leptospira biflexa serovar Patoc strain 'Patoc 1 (Ames)'	3956089	0		0		0		1		1		0		0		0		0		0		0		I
456481	Spirochaetes	Leptospira biflexa serovar Patoc strain 'Patoc 1 (Paris)'	3951448	0		0		0		1		1		0		0		0		0		0		0		I
355277	Spirochaetes	Leptospira borgpetersenii serovar Hardjo-bovis JB197	3876235	0		0		0		1		1		0		0		0		0		0		0		I
355276	Spirochaetes	Leptospira borgpetersenii serovar Hardjo-bovis L550	3931782	0		0		0		1		1		0		0		0		0		0		0		I
267671	Spirochaetes	Leptospira interrogans serovar Copenhageni str. Fiocruz L1-130	4627366	0		0		0		1		1		0		0		0		0		0		0		I
189518	Spirochaetes	Leptospira interrogans serovar Lai str. 56601	4691184	0		0		0		1		1		0		0		0		0		0		0		I
243275	Spirochaetes	Treponema denticola ATCC 35405	2843201	1		1		0		0		0		0		0		0		0		0		0		D
455434	Spirochaetes	Treponema pallidum subsp. pallidum SS14	1139457	1		1		0		0		0		0		0		0		0		0		0		D
243276	Spirochaetes	Treponema pallidum subsp. pallidum str. Nichols	1138011	1		1		0		0		0		0		0		0		0		0		0		D
381764	Thermotogae	Fervidobacterium nodosum Rt17-B1	1948941	0		0		0		0		0		1		0		0		0		0		1			I
403833	Thermotogae	Petrotoga mobilis SJ95	2169548	0		0		0		0		0		1		0		0		0		0		1			I
391009	Thermotogae	Thermosipho melanesiensis BI429	1915238	0		0		0		0		0		1		0		0		0		0		1			I
416591	Thermotogae	Thermotoga lettingae TMO	2135342	0		0		0		0		0		1		0		0		0		1		2			I
243274	Thermotogae	Thermotoga maritima MSB8	1860725	0		0		0		0		0		1		0		0		0		1		1			I
390874	Thermotogae	Thermotoga petrophila RKU-1	1823511	0		0		0		0		0		1		0		0		0		1		1			I
126740	Thermotogae	Thermotoga sp. RQ2	1877693	0		0		0		0		0		1		0		0		0		1		1			I
349741	Verrucomicrobiae	Akkermansia muciniphila ATCC BAA-835	2664102	1		1		0		1		1		0		0		0		0		0		1		D+I
329726	Unclassified	Acaryochloris marina MBIC11017	8361599	0		0		0		1		1		0		0		0		0		0		0		I
445932	Unclassified	Elusimicrobium minutum Pei191	1643562	1		1		0		1		1		0		0		0		0		1		1		D+I
156889	Unclassified	Magnetococcus sp. MC-1	4719581	0		0		0		1		1		1		0		0		0		1		0		I
481448	Unclassified	Methylacidiphilum infernorum V4	2287145	1		1		0		0		0		0		0		0		0		0		0		D
